# Supplementary material
Source: MDPI journal article supplement (https://www.mdpi.com/1999-4907/8/11/407)
Supplement: s1 [file s1]

## Supplementary basic data

Article

# Taxon independent and taxon dependent responses to drought in seedlings from *Quercus robur*, *Q. petraea* and their morphological intermediates

Kristine Vander Mijnsbrugge<sup>1\*</sup>, Arion Turcsán<sup>1,2,3</sup>, Jorne Maes<sup>4</sup>, Nils Duchêne<sup>4</sup>, Steven Meeus<sup>4</sup>, Beatrijs Van der Aa<sup>1</sup>, Kathy Steppe<sup>5</sup> and Marijke Steenackers<sup>1</sup>

<sup>1</sup> Department of Forest Genetic Resources, Research Institute for Nature and Forest, Geraardsbergen, Belgium

<sup>2</sup> Department of Biometrics and Agricultural Informatics, Szent István University, Budapest, Hungary

<sup>3</sup> Department of Forest Reproductive Material and Plantation Management, West-Hungarian University, Institute of Silviculture and Forest Protection, Sopron, Hungary

<sup>4</sup> Department of Agro- and Biotechnology, School of Technology, Odisee University College, Sint-Niklaas, Belgium

<sup>5</sup> Laboratory of Plant Ecology, Faculty of Bioscience Engineering, Ghent University, Belgium

\* Correspondence: Kristine Vander Mijnsbrugge (first name: Kristine, last name: Vander Mijnsbrugge) kristine.vandermijnsbrugge@inbo.be; Tel.: +32 478 28 21 37

**Table S5.** Basic data. plID: plant identity number; No\_m: number of the mother tree; Tax\_m: taxon of the mother tree (p: *Q. petraea*, pr: long stalked intermediate, rp: short stalked intermediate, r: *Q. robur*); Tr: treatment (1: control, 2: drought treated); Sur: survival (0: no survival; 1 survival); Se1: leaf senescence score on DOY 335 in 2014 (Table S2); Bb1: Bud burst score on DOY 128 in 2015 (Table S2); Se2, Se3 and Se4: leaf senescence scores on DOY292, DOY313 and DOY330 in 2015 respectively (Table S2); UIV, LIV, PL and LE: leaf morphological descriptors (Table S1); H14 and H15: height (cm) at the end of 2014 and 2015 respectively; D14 and D15: diameter (mm) at the end of 2014 and 2015 respectively; Por: leaf stomatal resistance (s/m) measured by a diffusion porometer; W134, W141, W148, W155, W161, W169, W182, W218, W225, W247, W254, W261, W268, W275, W281, W290, W295 and W302: weights (g) of the pots on the respective DOY's in 2014; WC182, WC268, WC275, WC281, WC290 and WC295: evaluation of wilting and/or curling of the leaves on the respective DOY's in 2014 (1: wilting and/or curling present).

| plID | No_m | Tax_m | Tr | Sur | Se1 | Bb1 | Se2 | Se3 | Se4 | UIV | LIV | PL | LE | H14  | H15 | D14  | D15  | Por |
|------|------|-------|----|-----|-----|-----|-----|-----|-----|-----|-----|----|----|------|-----|------|------|-----|
| H1   | 4    | rp    | 1  | 1   | 7   | 2   | 4   | 8   | 8   | 1   | 1   | 0  | 2  | 10,5 | 28  | 4,05 | 5,27 |     |

|      |    |    |   |   |   |   |   |   |   |   |   |   |   |      |      |      |      |
|------|----|----|---|---|---|---|---|---|---|---|---|---|---|------|------|------|------|
| H10  | 4  | rp | 1 | 1 | 6 | 5 | 4 | 8 | 8 | 1 | 1 | 0 | 2 | 12   | 33   | 3,49 | 6,08 |
| H100 | 13 | p  | 1 | 1 | 5 | 6 | 2 | 5 | 8 | 0 | 0 | 1 | 1 | 12   | 15   | 3,54 | 4,63 |
| H101 | 13 | p  | 1 | 1 | 5 | 6 | 2 | 5 | 8 | 0 | 0 | 1 | 0 | 6    | 9    | 3,52 | 5,4  |
| H102 | 15 | r  | 1 | 1 | 6 | 5 | 4 | 8 | 8 | 1 | 1 | 1 | 2 | 8    | 21   | 3,7  | 6,02 |
| H103 | 15 | r  | 1 | 1 | 7 | 5 | 2 | 4 | 8 | 1 | 1 | 0 | 0 | 2    | 8    | 2,09 | 3,15 |
| H104 | 15 | r  | 1 | 1 | 4 | 5 | 2 | 8 | 8 | 1 | 1 | 0 | 2 | 16,5 | 21   | 4,59 | 5,79 |
| H105 | 15 | r  | 1 | 1 | 3 | 6 | 2 | 6 | 8 | 0 | 0 | 0 | 1 | 4    | 20   | 2,36 | 4,2  |
| H106 | 13 | p  | 1 | 1 | 4 | 6 | 4 | 8 | 8 | 1 | 1 | 0 | 1 | 4    | 36   | 3,97 | 5,77 |
| H107 | 13 | p  | 1 | 1 | 3 | 6 | 2 | 6 | 8 | 0 | 0 | 1 | 0 | 9    | 15   | 6,37 | 8,72 |
| H108 | 13 | p  | 1 | 1 | 4 | 6 | 2 | 3 | 4 | 0 | 0 | 0 | 1 | 8,5  | 12   | 3,93 | 3,93 |
| H109 | 13 | p  | 1 | 1 | 3 | 6 | 2 | 2 | 3 | 0 | 1 | 1 | 1 | 10   | 13   | 2,57 | 3,81 |
| H11  | 4  | rp | 1 | 1 | 6 | 5 | 2 | 6 | 8 | 0 | 1 | 0 | 2 | 11,5 | 39   | 4,36 | 5,95 |
| H110 | 15 | r  | 1 | 1 | 8 | 3 | 2 | 3 | 4 | 1 | 0 | 1 | 0 | 2,5  | 13   | 2,81 | 3,02 |
| H111 | 15 | r  | 1 | 1 | 7 | 5 | 4 | 8 | 8 | 1 | 1 | 1 | 2 | 6    | 28   | 3,67 | 5,35 |
| H112 | 15 | r  | 1 | 1 | 4 | 6 | 3 | 8 | 8 | 1 | 1 | 0 | 2 | 7,5  | 29   | 3,43 | 5,77 |
| H113 | 13 | p  | 1 | 1 | 7 | 6 | 2 | 5 | 8 | 0 | 0 | 2 | 0 | 9    | 11   | 4,54 | 5,3  |
| H114 | 13 | p  | 1 | 1 | 5 | 6 | 2 | 8 | 8 | 0 | 0 | 0 | 1 | 8    | 15   | 2,51 | 3,6  |
| H115 | 13 | p  | 1 | 1 | 7 | 6 | 3 | 8 | 8 | 0 | 1 | 0 | 2 | 8    | 23   | 4,08 | 8,11 |
| H116 | 13 | p  | 1 | 1 | 5 | 6 | 2 | 3 | 5 | 0 | 0 | 1 | 0 | 6    | 9    | 2,84 | 4,04 |
| H117 | 5  | p  | 1 | 1 | 4 | 3 | 2 | 3 | 8 | 0 | 0 | 2 | 0 | 8    | 9    | 2,7  | 2,95 |
| H118 | 5  | p  | 1 | 1 | 6 | 4 | 2 | 8 | 8 | 0 | 0 | 2 | 0 | 13   | 17   | 4,03 | 4,72 |
| H119 | 5  | p  | 1 | 1 | 7 | 4 | 2 | 8 | 8 | 0 | 1 | 2 | 0 | 4,5  | 9    | 2,9  | 3,15 |
| H12  | 4  | rp | 1 | 1 | 6 | 5 | 3 | 4 | 8 | 1 | 1 | 0 | 2 | 6    | 29,5 | 2,73 | 4,52 |
| H120 | 5  | p  | 1 | 1 | 7 | 5 | 2 | 8 | 8 | 0 | 1 | 2 | 0 | 13,5 | 17   | 5,04 | 6,17 |
| H121 | 5  | p  | 1 | 1 | 8 | 5 | 2 | 8 | 8 | 0 | 0 | 2 | 0 | 6,5  | 10   | 2,77 | 3,91 |
| H122 | 5  | p  | 1 | 1 | 7 | 5 | 2 | 8 | 8 | 0 | 0 | 2 | 0 | 7    | 9    | 3,6  | 5,99 |
| H123 | 5  | p  | 1 | 1 | 5 | 6 | 2 | 8 | 8 | 0 | 0 | 2 | 0 | 4    | 11   | 3,84 | 4,74 |
| H124 | 5  | p  | 1 | 1 | 7 | 6 | 2 | 8 | 8 | 0 | 0 | 1 | 1 | 6    | 14   | 3,68 | 6,39 |
| H125 | 5  | p  | 1 | 1 | 5 | 6 | 2 | 5 | 6 | 0 | 0 | 2 | 0 | 4,5  | 11   | 3,1  | 4,81 |
| H127 | 5  | p  | 1 | 1 | 7 | 5 | 3 | 8 | 8 | 1 | 1 | 1 | 1 | 9    | 13   | 4,99 | 6,35 |

|      |    |    |   |   |   |   |   |   |   |   |   |   |   |      |      |      |      |
|------|----|----|---|---|---|---|---|---|---|---|---|---|---|------|------|------|------|
| H128 | 5  | p  | 1 | 1 | 6 | 5 | 1 | 8 | 8 | 1 | 1 | 1 | 0 | 9    | 10,5 | 3,94 | 4,77 |
| H129 | 5  | p  | 1 | 1 | 7 | 5 | 2 | 8 | 8 | 1 | 1 | 1 | 1 | 11   | 13   | 3,61 | 5,03 |
| H13  | 4  | rp | 1 | 1 | 7 | 6 | 3 | 8 | 8 | 1 | 1 | 0 | 1 | 14   | 32,5 | 4,26 | 5,67 |
| H130 | 5  | p  | 1 | 1 | 5 | 6 | 2 | 7 | 8 | 0 | 0 | 2 | 0 | 12   | 15   | 4,94 | 7,2  |
| H131 | 16 | rp | 1 | 1 | 1 | 6 | 2 | 4 | 6 | 1 | 1 | 0 | 2 | 14,5 | 34   | 4,03 | 5,98 |
| H132 | 16 | rp | 1 | 1 | 4 | 6 | 3 | 8 | 8 | 1 | 1 | 1 | 2 | 19   | 26   | 3,75 | 5,41 |
| H133 | 16 | rp | 1 | 1 | 3 | 5 | 3 | 4 | 8 | 0 | 1 | 0 | 2 | 12   | 27   | 4,61 | 7,48 |
| H134 | 16 | rp | 1 | 1 | 3 | 4 | 3 | 7 | 8 | 1 | 1 | 0 | 2 | 12   | 35   | 3,98 | 5,48 |
| H135 | 16 | rp | 1 | 1 | 3 | 5 | 3 | 7 | 8 | 1 | 1 | 0 | 2 | 9    | 27   | 5,21 | 6,51 |
| H136 | 16 | rp | 1 | 1 | 3 | 6 | 2 | 6 | 6 | 0 | 1 | 0 | 2 | 12   | 36   | 5,28 | 7,67 |
| H137 | 16 | rp | 1 | 1 | 3 | 6 | 3 | 4 | 8 | 1 | 1 | 0 | 2 | 12   | 27   | 3,81 | 5,98 |
| H138 | 17 | p  | 1 | 1 | 8 | 4 | 2 | 5 | 8 | 0 | 0 | 1 | 1 | 10   | 11   | 2,77 | 3,3  |
| H139 | 14 | p  | 1 | 1 | 8 | 6 | 5 | 8 | 8 | 0 | 1 | 0 | 2 | 8    | 19   | 3,21 | 3,76 |
| H14  | 4  | rp | 1 | 1 | 6 | 5 | 3 | 8 | 8 | 1 | 1 | 0 | 2 | 19   | 25   | 3,84 | 5,32 |
| H140 | 8  | r  | 1 | 1 | 8 | 3 | 2 | 4 | 6 | 1 | 1 | 0 | 2 | 23   | 27   | 6,23 | 6,24 |
| H141 | 8  | r  | 1 | 1 | 7 | 4 | 2 | 5 | 8 | 0 | 1 | 0 | 2 | 22,5 | 24   | 4,25 | 5,6  |
| H142 | 17 | p  | 1 | 1 | 8 | 5 | 3 | 8 | 8 | 0 | 0 | 1 | 1 | 4,5  | 7    | 2,51 | 2,86 |
| H143 | 17 | p  | 1 | 1 | 7 | 5 | 3 | 3 | 7 | 0 | 0 | 1 | 1 | 9    | 17   | 3,13 | 3,4  |
| H144 | 18 | r  | 1 | 1 | 8 | 6 | 3 | 8 | 8 | 0 | 0 | 0 | 2 | 8    | 10   | 3,59 | 3,54 |
| H145 | 17 | p  | 1 | 1 | 7 | 5 | 2 | 4 | 5 | 0 | 0 | 0 | 2 | 6    | 9    | 2,97 | 3,82 |
| H146 | 17 | p  | 1 | 1 | 8 | 5 | 2 | 3 | 5 | 0 | 0 | 0 | 1 | 10   | 13   | 3,75 | 4,9  |
| H147 | 18 | r  | 1 | 1 | 3 | 5 | 3 | 8 | 8 | 1 | 1 | 0 | 2 | 9    | 13   | 3,22 | 4,24 |
| H148 | 8  | r  | 1 | 1 | 8 | 3 | 2 | 3 | 4 | 0 | 1 | 0 | 2 | 26   | 36   | 5,09 | 5,77 |
| H149 | 17 | p  | 1 | 1 | 7 | 5 | 2 | 5 | 8 | 0 | 0 | 1 | 1 | 7,5  | 14   | 4,39 | 5,69 |
| H15  | 9  | r  | 1 | 1 | 8 | 4 | 3 | 7 | 8 | 1 | 1 | 0 | 2 | 9,5  | 39,5 | 4,04 | 6,5  |
| H150 | 17 | p  | 1 | 1 | 6 | 6 | 2 | 5 | 5 | 0 | 0 | 1 | 0 | 5    | 8    | 2,47 | 3,31 |
| H151 | 18 | r  | 1 | 1 | 5 | 5 | 3 | 7 | 8 | 1 | 1 | 0 | 2 | 8    | 12,5 | 3,26 | 4,52 |
| H152 | 14 | p  | 1 | 1 | 7 | 5 | 3 | 3 | 3 | 0 | 0 | 0 | 0 | 11   | 15,5 | 3,29 | 3,7  |
| H153 | 8  | r  | 1 | 1 | 7 | 6 | 2 | 4 | 5 | 0 | 1 | 0 | 2 | 24,5 | 29   | 4,81 | 6,22 |
| H154 | 8  | r  | 1 | 1 | 7 | 6 | 2 | 6 | 7 | 1 | 1 | 0 | 2 | 33,5 | 39   | 4,54 | 5,89 |
| H155 | 8  | r  | 1 | 1 | 1 | 5 | 2 | 3 | 4 | 1 | 1 | 2 | 1 | 8    | 14,5 | 3,45 | 6,05 |

|      |    |    |   |   |   |   |   |   |   |   |   |   |   |      |      |      |      |
|------|----|----|---|---|---|---|---|---|---|---|---|---|---|------|------|------|------|
| H156 | 8  | r  | 1 | 1 | 8 | 6 | 4 | 8 | 8 | 1 | 1 | 0 | 2 | 21,5 | 25,5 | 3,55 | 5,52 |
| H157 | 8  | r  | 1 | 1 | 8 | 5 | 2 | 5 | 6 | 1 | 1 | 0 | 2 | 31   | 40   | 4,2  | 5,66 |
| H158 | 18 | r  | 1 | 1 | 8 | 6 | 2 | 4 | 8 | 1 | 1 | 0 | 2 | 14   | 17,5 | 3,91 | 4,45 |
| H159 | 18 | r  | 1 | 1 | 4 | 5 | 4 | 8 | 8 | 1 | 1 | 0 | 2 | 11   | 17   | 4,99 | 5,71 |
| H16  | 9  | r  | 1 | 1 | 8 | 6 | 4 | 8 | 8 | 1 | 1 | 0 | 2 | 7    | 35   | 4,75 | 4,85 |
| H160 | 8  | r  | 1 | 1 | 7 | 4 | 2 | 3 | 3 | 1 | 1 | 0 | 2 | 27   | 29   | 4,43 | 5,9  |
| H161 | 8  | r  | 1 | 1 | 7 | 6 | 2 | 6 | 8 | 1 | 1 | 1 | 0 | 18   | 27,5 | 3,67 | 5,46 |
| H162 | 12 | r  | 1 | 1 | 8 | 5 | 3 | 6 | 8 | 1 | 1 | 1 | 2 | 4    | 27   | 2,63 | 5,2  |
| H163 | 12 | r  | 1 | 1 | 7 | 4 | 2 | 3 | 3 | 1 | 1 | 0 | 2 | 17   | 12   | 5,13 | 4,93 |
| H164 | 7  | rp | 1 | 1 | 7 | 6 | 3 | 5 | 8 | 0 | 1 | 1 | 1 | 10   | 14   | 3,57 | 5,47 |
| H165 | 7  | rp | 1 | 1 | 7 | 6 | 3 | 8 | 8 | 1 | 1 | 0 | 2 | 3    | 3    | 1,89 | 6,26 |
| H166 | 6  | rp | 1 | 1 | 8 | 6 | 3 | 3 | 6 | 0 | 0 | 1 | 0 | 6    | 11,5 | 2,77 | 2,89 |
| H167 | 6  | rp | 1 | 1 | 7 | 6 | 2 | 3 | 3 | 0 | 1 | 0 | 2 | 4    | 10   | 2,75 | 3,23 |
| H168 | 6  | rp | 1 | 1 | 6 | 6 | 2 | 8 | 8 | 1 | 1 | 0 | 2 | 3    | 21,5 | 2,17 | 4,57 |
| H169 | 12 | r  | 1 | 1 | 7 | 5 | 3 | 7 | 8 | 1 | 1 | 0 | 2 | 9,5  | 35   | 3,3  | 4,72 |
| H17  | 9  | r  | 1 | 1 | 6 | 4 | 2 | 4 | 4 | 1 | 1 | 0 | 2 | 13   | 38   | 5,06 | 7,26 |
| H170 | 12 | r  | 1 | 1 | 7 | 6 | 3 | 8 | 8 | 0 | 1 | 0 | 2 | 20   | 30   | 4,39 | 5,37 |
| H171 | 7  | rp | 1 | 1 | 8 | 6 | 2 | 5 | 8 | 0 | 0 | 0 | 2 | 7    | 16   | 3,21 | 3,89 |
| H172 | 7  | rp | 1 | 1 | 7 | 4 | 1 | 3 | 5 | 1 | 0 | 0 | 0 | 5    | 8,5  | 1,65 | 1,95 |
| H173 | 6  | rp | 1 | 1 | 8 | 4 | 2 | 4 | 8 | 1 | 1 | 0 | 2 | 10   | 18   | 4,42 | 4,54 |
| H174 | 6  | rp | 1 | 1 | 7 | 5 | 3 | 6 | 8 | 1 | 0 | 1 | 0 | 6    | 23   | 3,28 | 4,94 |
| H175 | 6  | rp | 1 | 1 | 3 | 6 | 3 | 5 | 8 | 1 | 1 | 0 | 2 | 7    | 17,5 | 3,4  | 4,43 |
| H176 | 12 | r  | 1 | 1 | 8 | 6 | 2 | 8 | 8 | 1 | 1 | 0 | 2 | 6    | 19,5 | 4,05 | 5,87 |
| H177 | 12 | r  | 1 | 1 | 6 | 5 | 2 | 5 | 8 | 1 | 1 | 0 | 2 | 19   | 32   | 4,66 | 5,72 |
| H178 | 7  | rp | 1 | 1 | 8 | 5 | 5 | 8 | 8 | 1 | 1 | 0 | 1 | 11   | 18   | 2,8  | 3,2  |
| H179 | 7  | rp | 1 | 1 | 8 | 6 | 3 | 6 | 8 | 1 | 1 | 0 | 2 | 6    | 9,5  | 2,3  | 3,1  |
| H18  | 9  | r  | 1 | 1 | 4 | 5 | 3 | 7 | 8 | 1 | 1 | 0 | 2 | 7    | 33   | 4,09 | 7,06 |
| H180 | 6  | rp | 1 | 1 | 8 | 3 | 2 | 4 | 6 | 1 | 0 | 1 | 2 | 5    | 15   | 3,43 | 4,04 |
| H181 | 6  | rp | 1 | 1 | 7 | 6 | 3 | 8 | 8 | 1 | 1 | 0 | 2 | 8    | 13   | 3,56 | 4,56 |
| H182 | 6  | rp | 1 | 1 | 7 | 6 | 3 | 4 | 7 | 1 | 1 | 1 | 1 | 7    | 19,5 | 3,31 | 4,2  |
| H183 | 12 | r  | 1 | 1 | 7 | 6 | 2 | 7 | 8 | 1 | 1 | 0 | 2 | 6    | 16   | 3,35 | 5,01 |

|      |    |    |   |   |   |   |   |   |   |   |   |   |   |      |      |      |      |       |
|------|----|----|---|---|---|---|---|---|---|---|---|---|---|------|------|------|------|-------|
| H184 | 12 | r  | 1 | 1 | 6 | 6 | 3 | 8 | 8 | 0 | 0 | 2 | 1 | 10,5 | 35   | 3,97 | 5,64 |       |
| H185 | 7  | rp | 1 | 1 | 8 | 6 | 3 | 8 | 8 | 1 | 1 | 0 | 2 | 7,5  | 15,5 | 3,67 | 4,03 |       |
| H186 | 7  | rp | 1 | 1 | 8 | 6 | 3 | 8 | 8 | 1 | 1 | 0 | 0 | 2    | 10   | 1,73 | 2,4  |       |
| H187 | 6  | rp | 1 | 1 | 6 | 5 | 2 | 5 | 6 | 0 | 1 | 1 | 1 | 7    | 19   | 3,33 | 4,53 |       |
| H188 | 6  | rp | 1 | 1 | 8 | 6 | 3 | 8 | 8 | 1 | 1 | 0 | 2 | 11   | 17,5 | 3,47 | 5,13 |       |
| H189 | 6  | rp | 1 | 1 | 8 | 5 | 3 | 7 | 8 | 0 | 1 | 0 | 2 | 11   | 23   | 4,41 | 6,46 |       |
| H19  | 11 | rp | 1 | 1 | 8 | 5 | 3 | 4 | 4 | 1 | 1 | 1 | 1 | 6,5  | 28   | 2,52 | 4,01 |       |
| H190 | 12 | r  | 1 | 1 | 7 | 6 | 3 | 8 | 8 | 0 | 1 | 0 | 2 | 10   | 30   | 4,21 | 6,04 |       |
| H191 | 12 | r  | 1 | 1 | 8 | 5 | 2 | 7 | 8 | 0 | 0 | 1 | 1 | 8    | 22   | 3,25 | 5,23 |       |
| H192 | 7  | rp | 1 | 1 | 5 | 5 | 2 | 4 | 6 | 1 | 1 | 0 | 2 | 6,5  | 12   | 3,16 | 4,03 |       |
| H193 | 7  | rp | 1 | 1 | 8 | 5 | 2 | 8 | 8 | 1 | 1 | 0 | 2 | 7,5  | 19,5 | 2,83 | 4,09 |       |
| H194 | 8  | r  | 1 | 1 | 7 | 6 | 2 | 8 | 8 | 0 | 1 | 1 | 2 | 15   | 22   | 4,47 | 5,72 |       |
| H195 | 6  | rp | 1 | 1 | 4 | 3 | 2 | 6 | 8 | 0 | 0 | 1 | 2 | 5,5  | 15,5 | 2,92 | 3,76 |       |
| H196 | 6  | rp | 1 | 1 | 4 | 5 | 2 | 3 | 3 | 0 | 1 | 1 | 0 | 5,5  | 23   | 3,26 | 4,78 |       |
| H197 | 11 | rp | 2 | 1 |   |   | 3 | 8 | 8 | 1 | 0 | 1 | 2 | 12   | 11   | 3,8  | 4,04 | 111,7 |
| H198 | 11 | rp | 2 | 1 | 7 | 5 | 3 | 8 | 8 | 0 | 1 | 1 | 2 | 6,5  | 12   | 4,33 | 4,78 | 132,7 |
| H199 | 11 | rp | 2 | 0 |   |   |   |   |   | 1 | 0 | 1 | 2 | 16,5 |      | 3,77 |      | 364,7 |
| H2   | 4  | rp | 1 | 1 | 7 | 6 | 3 | 8 | 8 | 0 | 0 | 1 | 0 | 6,5  | 18,5 | 2,98 | 4,33 |       |
| H20  | 8  | r  | 1 | 1 | 8 | 4 | 2 | 8 | 8 | 1 | 1 | 0 | 2 | 27   | 41   | 4,76 | 4,49 |       |
| H200 | 1  | r  | 2 | 0 |   |   |   |   |   | 1 | 1 | 1 | 0 | 19   |      | 5,3  |      | 306,3 |
| H201 | 1  | r  | 2 | 0 |   |   |   |   |   | 1 | 1 | 1 | 1 | 24   |      | 4,75 |      | 491,7 |
| H202 | 1  | r  | 2 | 0 |   |   |   |   |   |   |   |   |   | 25,5 |      | 4,57 |      | 442,7 |
| H203 | 1  | r  | 2 | 0 |   |   |   |   |   |   |   |   |   | 23   |      | 4,2  |      | 481,7 |
| H204 | 11 | rp | 2 | 1 | 8 | 5 | 3 | 8 | 8 | 0 | 0 | 0 | 2 | 6    | 11   | 3,54 | 4,2  | 205,3 |
| H205 | 9  | r  | 2 | 1 | 7 | 5 | 4 | 8 | 8 | 0 | 0 | 1 | 2 | 12   | 22,5 | 5,06 | 5,84 | 130   |
| H206 | 9  | r  | 2 | 1 | 5 | 4 | 3 | 5 | 8 | 0 | 0 | 1 | 1 | 6    | 18   | 4,87 | 6,44 | 123   |
| H207 | 1  | r  | 2 | 0 |   |   |   |   |   | 0 | 0 | 0 | 2 | 17   |      | 4,26 |      | 95    |
| H208 | 1  | r  | 2 | 0 |   |   |   |   |   | 1 | 1 | 1 | 1 | 29,5 |      | 5,41 |      | 926,7 |
| H209 | 1  | r  | 2 | 0 |   |   |   |   |   |   |   |   |   | 21   |      | 4,8  |      | 946,7 |
| H21  | 8  | r  | 1 | 1 | 8 | 4 | 3 | 3 | 4 | 0 | 1 | 0 | 2 | 19,5 | 21,5 | 5,06 | 5,43 |       |
| H210 | 1  | r  | 2 | 0 |   |   |   |   |   | 1 | 0 | 1 | 0 | 19,5 |      | 4,53 |      | 1047  |

|      |    |    |   |   |   |   |   |   |   |   |   |   |   |      |      |      |      |       |
|------|----|----|---|---|---|---|---|---|---|---|---|---|---|------|------|------|------|-------|
| H211 | 11 | rp | 2 | 1 | 4 | 6 | 5 | 8 | 8 | 1 | 1 | 2 | 2 | 7    | 13   | 3,35 | 4,92 | 178   |
| H212 | 8  | r  | 2 | 1 | 8 | 2 | 2 | 3 | 3 | 0 | 0 | 0 | 2 | 15   | 19   | 2,15 | 3,45 | 451,7 |
| H213 | 17 | p  | 2 | 1 | 4 | 2 | 3 | 8 | 8 | 0 | 1 | 1 | 0 | 2    | 3    | 3,13 | 3,26 | 122   |
| H214 | 17 | p  | 2 | 1 | 4 | 6 | 3 | 4 | 4 | 0 | 1 | 1 | 0 | 6    | 12   | 2,5  | 3,29 | 515   |
| H215 | 17 | p  | 2 | 0 |   |   |   |   |   | 0 | 0 | 2 | 0 | 10   |      | 3,92 |      | 953,3 |
| H216 | 17 | p  | 2 | 0 |   |   |   |   |   |   |   |   |   | 15   |      | 3,44 |      | 158,7 |
| H217 | 17 | p  | 2 | 0 |   |   |   |   |   |   |   |   |   | 10   |      | 4,05 |      | 268,3 |
| H218 | 8  | r  | 2 | 0 |   |   |   |   |   | 1 | 1 | 1 | 2 | 29,5 |      | 4,68 |      | 873,3 |
| H219 | 8  | r  | 2 | 1 | 3 | 5 | 3 | 7 | 8 | 0 | 0 | 0 | 2 | 10   | 18   | 5,02 | 7,26 | 290,7 |
| H22  | 9  | r  | 1 | 1 | 8 | 6 | 4 | 8 | 8 | 1 | 1 | 0 | 1 | 10   | 23,5 | 5,15 | 5,05 |       |
| H220 | 8  | r  | 2 | 1 | 8 | 2 | 2 | 3 | 3 | 0 | 1 | 0 | 2 | 22   | 24   | 4,54 | 4,88 | 766,7 |
| H221 | 8  | r  | 2 | 1 | 8 | 2 | 3 | 3 | 7 | 0 | 0 | 0 | 2 | 20,5 | 23   | 5,16 | 4,82 | 1070  |
| H222 | 8  | r  | 2 | 0 |   |   |   |   |   | 1 | 1 | 0 | 1 | 26   |      | 4,25 |      | 610   |
| H223 | 8  | r  | 2 | 0 |   |   |   |   |   |   |   |   |   | 28   |      | 5,02 |      | 980   |
| H224 | 17 | p  | 2 | 0 |   |   |   |   |   |   |   |   |   | 7    |      | 3,51 |      | 933,3 |
| H225 | 8  | r  | 2 | 1 | 8 | 3 | 5 | 8 | 8 | 0 | 1 | 0 | 2 | 26   | 32   | 4,26 | 4,51 | 853,3 |
| H226 | 8  | r  | 2 | 1 | 6 | 3 | 3 | 6 | 8 | 0 | 0 | 0 | 2 | 19   | 24   | 4,85 | 6,71 | 248   |
| H227 | 8  | r  | 2 | 1 | 4 | 5 | 2 | 6 | 8 | 1 | 0 | 0 | 2 | 14   | 29   | 4,07 | 6,04 | 244,3 |
| H228 | 8  | r  | 2 | 1 | 4 | 6 | 3 | 7 | 8 | 1 | 1 | 1 | 2 | 14   | 24   | 4,44 | 6,52 | 251,3 |
| H229 | 11 | rp | 2 | 1 | 8 | 5 | 3 | 4 | 8 | 1 | 1 | 0 | 2 | 5,5  | 12   | 3,33 | 3,65 | 305,5 |
| H23  | 9  | r  | 1 | 1 | 5 | 6 | 3 | 5 | 5 | 0 | 1 | 0 | 2 | 11   | 25,5 | 3,87 | 6,91 |       |
| H230 | 11 | rp | 2 | 0 |   |   |   |   |   |   |   |   |   | 6,5  |      | 2,56 |      | 112,7 |
| H231 | 17 | p  | 2 | 1 | 8 | 3 | 1 | 3 | 4 | 0 | 0 | 1 | 0 | 4,5  | 7    | 2,29 | 2,96 | 180,7 |
| H232 | 2  | p  | 2 | 1 | 7 | 2 | 4 | 8 | 8 | 0 | 0 | 1 | 0 | 10,5 | 18   | 5,25 | 6,55 | 234,7 |
| H233 | 10 | pr | 2 | 1 | 4 | 6 | 3 | 6 | 8 | 0 | 0 | 0 | 2 | 12   | 22   | 3,3  | 5,77 | 326,7 |
| H234 | 2  | p  | 2 | 1 | 7 | 2 | 4 | 8 | 8 | 0 | 0 | 2 | 0 | 7    | 21   | 3,9  | 4,91 | 123,7 |
| H235 | 2  | p  | 2 | 1 | 7 | 3 | 3 | 8 | 8 | 0 | 0 | 0 | 2 | 7    | 18   | 3,78 | 6,35 | 160,7 |
| H236 | 2  | p  | 2 | 1 | 6 | 4 | 3 | 7 | 8 | 1 | 0 | 2 | 0 | 8,5  | 17   | 3,79 | 5,01 | 244   |
| H237 | 2  | p  | 2 | 1 | 8 | 4 | 7 | 8 | 8 | 0 | 0 | 1 | 0 | 7,5  | 13   | 2,95 | 4,53 | 213,3 |
| H238 | 2  | p  | 2 | 1 | 6 | 5 | 3 | 7 | 8 | 0 | 0 | 2 | 0 | 2,5  | 5    | 2,25 | 3,78 | 192   |
| H239 | 10 | pr | 2 | 1 | 3 | 6 | 2 | 5 | 6 | 0 | 0 | 0 | 2 | 6,5  | 24   | 2,85 | 4,29 | 173   |

|      |    |    |   |   |   |   |   |   |   |   |   |   |   |      |      |      |      |       |
|------|----|----|---|---|---|---|---|---|---|---|---|---|---|------|------|------|------|-------|
| H24  | 11 | rp | 1 | 1 | 7 | 5 | 2 | 5 | 7 | 0 | 1 | 0 | 1 | 10,5 | 32,5 | 3,6  | 5,14 |       |
| H240 | 10 | pr | 2 | 1 | 7 | 4 | 2 | 4 | 4 | 0 | 1 | 0 | 2 | 10   | 14   | 2,91 | 4,7  | 229,3 |
| H241 | 2  | p  | 2 | 1 |   |   | 4 | 7 | 8 | 1 | 1 | 1 | 1 | 14   | 12,5 | 4,03 | 5,2  | 177   |
| H242 | 2  | p  | 2 | 1 |   |   | 3 | 5 | 6 | 0 | 0 | 0 | 1 | 13   | 8    | 4,38 | 1,57 | 182,7 |
| H243 | 10 | pr | 2 | 0 |   |   |   |   |   | 0 | 0 | 0 | 2 | 9    |      | 4,53 |      | 202,3 |
| H244 | 10 | pr | 2 | 1 | 4 | 2 | 1 | 4 | 7 | 0 | 0 | 1 | 0 | 4    | 6    | 2,42 | 2,7  |       |
| H245 | 2  | p  | 2 | 1 |   |   | 3 | 3 | 3 | 0 | 0 | 1 | 1 | 10   | 7    | 3,85 | 2,28 | 210,7 |
| H246 | 10 | pr | 2 | 1 |   |   | 3 | 3 | 4 | 1 | 0 | 0 | 2 | 6    | 13   | 3,66 | 3,05 | 224,7 |
| H247 | 10 | pr | 2 | 1 | 7 | 4 | 2 | 3 | 3 | 1 | 1 | 0 | 1 | 14,5 | 18   | 4,05 | 5,9  | 282,7 |
| H248 | 10 | pr | 2 | 1 | 4 | 4 | 3 | 4 | 4 | 0 | 0 | 0 | 2 | 4    | 13   | 2,66 | 4,4  | 134,3 |
| H249 | 10 | pr | 2 | 1 | 5 | 4 | 3 | 4 | 5 | 1 | 1 | 1 | 2 | 7,5  | 16   | 2,87 | 4,4  | 165,7 |
| H25  | 11 | rp | 1 | 1 | 6 | 5 | 3 | 8 | 8 | 1 | 1 | 0 | 2 | 4    | 25   | 1,95 | 3,56 |       |
| H250 | 10 | pr | 2 | 1 | 5 | 5 | 2 | 5 | 5 | 1 | 1 | 0 | 2 | 4,5  | 24   | 3,07 | 5,55 | 140,3 |
| H251 | 10 | pr | 2 | 0 |   |   |   |   |   |   |   |   |   | 12   |      | 4,17 |      | 459   |
| H252 | 2  | p  | 2 | 0 |   |   |   |   |   | 0 | 0 | 1 | 0 | 9    |      | 4,46 |      | 586,7 |
| H253 | 14 | p  | 2 | 1 | 7 | 4 | 2 | 7 | 8 | 0 | 1 | 2 | 0 | 8    | 15,5 | 2,98 | 4,48 | 128,3 |
| H254 | 14 | p  | 2 | 1 | 3 | 6 | 3 | 6 | 8 | 0 | 1 | 2 | 0 | 5,5  | 10   | 3,3  | 3,8  | 152   |
| H255 | 14 | p  | 2 | 1 | 7 | 2 | 2 | 3 | 5 | 0 | 0 | 2 | 0 | 4,5  | 8    | 2,11 | 3,01 | 234   |
| H256 | 14 | p  | 2 | 1 | 2 | 6 | 4 | 8 | 8 | 0 | 0 | 2 | 0 | 7    | 15,5 | 3,2  | 4,58 | 139,7 |
| H257 | 14 | p  | 2 | 1 | 8 | 3 | 3 | 7 | 8 | 0 | 0 | 2 | 0 | 10   | 13   | 4,3  | 4,99 | 145,7 |
| H258 | 4  | rp | 2 | 0 |   |   |   |   |   | 1 | 0 | 0 | 2 | 16   |      | 4,1  |      | 656,7 |
| H259 | 4  | rp | 2 | 0 |   |   |   |   |   | 1 | 0 | 1 | 1 | 18   |      | 4,06 |      | 1397  |
| H26  | 11 | rp | 1 | 1 | 8 | 5 | 2 | 8 | 8 | 0 | 1 | 0 | 2 | 11   | 15,5 | 3,51 | 4,15 |       |
| H260 | 4  | rp | 2 | 1 | 8 | 4 | 2 | 4 | 6 | 1 | 0 | 0 | 2 | 8    | 10   | 2,87 | 4,04 | 173,3 |
| H261 | 4  | rp | 2 | 1 | 3 | 5 | 2 | 5 | 8 | 0 | 0 | 0 | 2 | 9    | 15,5 | 2,78 | 4,88 | 147,7 |
| H262 | 4  | rp | 2 | 1 | 3 | 4 | 4 | 8 | 8 | 1 | 1 | 0 | 2 | 4,5  | 13,5 | 3,2  | 4,48 | 146,3 |
| H263 | 4  | rp | 2 | 1 | 8 | 5 | 3 | 7 | 8 | 1 | 1 | 2 | 0 | 6,5  | 18   | 2,84 | 4,01 | 195,3 |
| H265 | 4  | rp | 2 | 0 |   |   |   |   |   | 1 | 0 | 0 | 1 | 19   |      | 3,31 |      | 1053  |
| H266 | 11 | rp | 2 | 1 | 8 | 3 | 2 | 6 | 8 | 0 | 0 | 1 | 1 | 5    | 8    | 2,69 | 3,12 | 906,7 |
| H267 | 7  | rp | 2 | 1 | 7 | 4 | 3 | 8 | 8 | 1 | 1 | 0 | 0 | 2    | 11   | 2,74 | 4,07 | 161,3 |
| H268 | 9  | r  | 2 | 1 | 7 | 4 | 3 | 7 | 8 | 1 | 1 | 0 | 2 | 9    | 14,5 | 2,76 | 3,81 | 290,7 |

|      |    |    |   |   |   |   |   |   |   |   |   |   |   |      |      |      |      |       |
|------|----|----|---|---|---|---|---|---|---|---|---|---|---|------|------|------|------|-------|
| H269 | 4  | rp | 2 | 0 |   |   |   |   |   | 1 | 0 | 1 | 0 | 12,5 |      | 2,59 |      | 343,3 |
| H27  | 11 | rp | 1 | 1 | 8 | 5 | 3 | 8 | 8 | 1 | 0 | 0 | 0 | 4,5  | 12,5 | 3,49 | 4,28 |       |
| H270 | 4  | rp | 2 | 1 | 3 | 6 | 3 | 7 | 8 | 0 | 1 | 0 | 2 | 8    | 15,5 | 3,01 | 5    | 197   |
| H271 | 4  | rp | 2 | 1 | 6 | 4 | 2 | 5 | 8 | 1 | 1 | 2 | 0 | 7    | 10   | 2,71 | 3,37 | 193,3 |
| H272 | 9  | r  | 2 | 0 |   |   |   |   |   | 1 | 0 | 0 | 2 | 13   |      | 3,67 |      | 220   |
| H273 | 4  | rp | 2 | 0 |   |   |   |   |   | 1 | 1 | 1 | 0 | 9,5  |      | 3,11 |      | 309,3 |
| H274 | 9  | r  | 2 | 1 | 8 | 5 | 7 | 8 | 8 | 1 | 1 | 0 | 2 | 15   | 22   | 4,71 | 4,39 | 356,3 |
| H275 | 9  | r  | 2 | 1 | 8 | 2 | 3 | 7 | 8 | 1 | 1 | 1 | 0 | 11,5 | 22   | 3,28 | 4,06 | 316,7 |
| H276 | 9  | r  | 2 | 1 | 8 | 5 | 3 | 7 | 8 | 0 | 0 | 0 | 2 | 9,5  | 21   | 3,66 | 4,3  | 225,7 |
| H277 | 9  | r  | 2 | 1 | 8 | 2 | 2 | 6 | 8 | 1 | 1 | 0 | 2 | 9    | 14   | 4,71 | 5,2  | 210,7 |
| H278 | 9  | r  | 2 | 1 | 5 | 5 | 4 | 8 | 8 | 0 | 1 | 1 | 2 | 7    | 16   | 3,69 | 4,79 | 242   |
| H279 | 9  | r  | 2 | 1 | 8 | 3 | 2 | 7 | 8 | 0 | 0 | 0 | 2 | 6    | 18   | 3,57 | 4,79 | 187,3 |
| H28  | 11 | rp | 1 | 1 | 7 | 3 | 3 | 5 | 8 | 1 | 1 | 1 | 1 | 7,5  | 18   | 3,3  | 4,74 |       |
| H280 | 9  | r  | 2 | 1 | 7 | 1 | 2 | 4 | 4 | 1 | 0 | 0 | 2 | 6    | 15,5 | 3,34 | 4,71 | 249,3 |
| H281 | 3  | p  | 2 | 0 |   |   |   |   |   | 0 | 0 | 2 | 0 | 15,5 |      | 2,97 |      | 1453  |
| H282 | 3  | p  | 2 | 1 | 8 | 4 | 2 | 7 | 8 | 0 | 0 | 2 | 0 | 3    | 11   | 4,2  | 4,33 | 125   |
| H283 | 3  | p  | 2 | 1 | 8 | 5 | 6 | 8 | 8 | 0 | 0 | 1 | 1 | 4,5  | 11   | 2,73 | 4,21 | 171,3 |
| H284 | 3  | p  | 2 | 1 | 6 | 5 | 2 | 6 | 8 | 0 | 0 | 1 | 0 | 4,5  | 4    | 3,07 | 2,27 |       |
| H285 | 3  | p  | 2 | 1 | 7 | 5 | 3 | 8 | 8 | 0 | 0 | 2 | 0 | 4    | 6    | 2,89 | 3,35 | 193,3 |
| H286 | 9  | r  | 2 | 1 | 8 | 5 | 6 | 8 | 8 | 1 | 0 | 1 | 2 | 6,5  | 12   | 3,86 | 5,96 | 155,7 |
| H287 | 9  | r  | 2 | 1 | 7 | 5 | 3 | 7 | 8 | 1 | 1 | 0 | 2 | 6,5  | 15,5 | 2,99 | 5,13 | 371,3 |
| H288 | 3  | p  | 2 | 1 | 7 | 6 | 4 | 8 | 8 | 0 | 0 | 2 | 2 | 12   | 14   | 3,19 | 3,6  | 510   |
| H289 | 5  | p  | 2 | 1 | 8 | 3 | 2 | 7 | 8 | 0 | 0 | 2 | 0 | 3    | 6    | 2,19 | 3,26 | 315,3 |
| H29  | 9  | r  | 1 | 1 | 8 | 5 | 4 | 8 | 8 | 1 | 1 | 0 | 2 | 5,5  | 27   | 2,75 | 3,69 |       |
| H290 | 3  | p  | 2 | 1 | 8 | 2 | 2 | 8 | 8 | 0 | 0 | 1 | 1 | 5,5  | 8    | 2,51 | 3,78 | 358,3 |
| H291 | 3  | p  | 2 | 1 | 7 | 3 | 3 | 8 | 8 | 0 | 0 | 1 | 1 | 5    | 9    | 2,44 | 3,14 | 800   |
| H292 | 3  | p  | 2 | 1 | 7 | 5 | 2 | 8 | 8 | 1 | 1 | 2 | 0 | 3,5  | 11   | 3,08 | 5,35 | 690   |
| H293 | 3  | p  | 2 | 1 | 8 | 4 | 2 | 8 | 8 | 1 | 0 | 0 | 1 | 9    | 12,5 | 3,46 | 4,1  | 1347  |
| H294 | 9  | r  | 2 | 1 | 4 | 4 | 6 | 8 | 8 | 1 | 0 | 0 | 2 | 10,5 | 22,5 | 3,53 | 5,01 | 493,3 |
| H295 | 11 | rp | 2 | 1 | 8 | 6 | 2 | 3 | 4 | 1 | 1 | 0 | 2 | 9    | 11   | 4,38 | 4,98 | 940   |
| H296 | 7  | rp | 2 | 1 | 3 | 5 | 4 | 4 | 4 | 1 | 1 | 1 | 0 | 6    | 11   | 3,61 | 5,3  | 274,7 |



|      |    |    |   |   |   |   |   |   |   |   |   |   |   |      |      |      |      |       |
|------|----|----|---|---|---|---|---|---|---|---|---|---|---|------|------|------|------|-------|
| H297 | 7  | rp | 2 | 0 |   |   |   |   |   |   |   |   |   | 14,5 |      | 3,62 |      | 773,3 |
| H298 | 6  | rp | 2 | 1 | 7 | 4 | 5 | 8 | 8 | 1 | 1 | 1 | 1 | 7,5  | 10   | 2,76 | 3,87 | 306,3 |
| H299 | 6  | rp | 2 | 0 |   |   |   |   |   |   |   |   |   | 2    |      | 2,5  |      | 776,7 |
| H3   | 4  | rp | 1 | 1 | 3 | 5 | 2 | 7 | 8 | 1 | 1 | 0 | 2 | 10   | 28   | 4,28 | 5,91 |       |
| H30  | 9  | r  | 1 | 1 | 7 | 5 | 4 | 8 | 8 | 1 | 1 | 0 | 1 | 9    | 32   | 3,65 | 5,8  |       |
| H300 | 6  | rp | 2 | 0 |   |   |   |   |   |   |   |   |   | 8    |      | 2,97 |      | 193   |
| H301 | 12 | r  | 2 | 1 | 5 | 4 | 3 | 7 | 8 | 1 | 1 | 1 | 1 | 5    | 11   | 3,58 | 3,18 | 193   |
| H302 | 11 | rp | 2 | 0 |   |   |   |   |   | 1 | 1 | 1 | 0 | 16   |      | 3,38 |      | 816,7 |
| H303 | 7  | rp | 2 | 1 | 6 | 5 | 2 | 4 | 5 | 0 | 0 | 1 | 0 | 5    | 9,5  | 2,14 | 3,04 | 160   |
| H304 | 7  | rp | 2 | 1 | 5 | 3 | 2 | 3 | 6 | 0 | 1 | 0 | 2 | 6    | 9    | 3,74 | 4,1  | 653,3 |
| H305 | 7  | rp | 2 | 1 | 5 | 4 | 3 | 8 | 8 | 0 | 0 | 0 | 2 | 9    | 11   | 3,52 | 4,63 | 993,3 |
| H306 | 6  | rp | 2 | 1 | 7 | 5 | 2 | 5 | 5 | 0 | 1 | 0 | 2 | 9    | 11,5 | 3,11 | 4,27 | 1123  |
| H307 | 7  | rp | 2 | 0 |   |   |   |   |   |   |   |   |   | 8    |      | 3,18 |      | 363   |
| H308 | 12 | r  | 2 | 1 | 7 | 6 | 3 | 6 | 8 | 1 | 1 | 1 | 0 | 6,5  | 11   | 3,31 | 4,4  | 1690  |
| H309 | 11 | rp | 2 | 1 | 6 | 6 | 3 | 8 | 8 | 1 | 1 | 0 | 2 | 9,5  | 15   | 3,44 | 4,21 | 381,7 |
| H31  | 11 | rp | 1 | 1 | 6 | 5 | 2 | 5 | 6 | 1 | 1 | 1 | 0 | 3,5  | 24   | 1,91 | 3,65 |       |
| H310 | 7  | rp | 2 | 1 | 6 | 5 | 2 | 3 | 4 | 1 | 1 | 1 | 1 | 6    | 10   | 2,59 | 4,11 | 193   |
| H311 | 7  | rp | 2 | 1 | 6 | 4 | 3 | 5 | 6 | 1 | 1 | 0 | 1 | 6    | 10,5 | 2,85 | 3,86 | 456,7 |
| H312 | 6  | rp | 2 | 1 | 6 | 4 | 2 | 8 | 8 | 1 | 1 | 1 | 2 | 4    | 6,5  | 2,64 | 3,64 | 140,7 |
| H313 | 6  | rp | 2 | 1 | 8 | 4 | 2 | 6 | 8 | 1 | 1 | 1 | 1 | 8    | 12   | 2,66 | 3,95 | 481,7 |
| H314 | 12 | r  | 2 | 1 | 7 | 5 | 3 | 6 | 8 | 1 | 1 | 0 | 0 | 11   | 18   | 3,4  | 4,38 | 590   |
| H315 | 6  | rp | 2 | 1 | 7 | 2 | 2 | 5 | 8 | 1 | 1 | 0 | 2 | 7    | 9,5  | 2,88 | 3,7  | 870   |
| H316 | 11 | rp | 2 | 1 | 6 | 5 | 3 | 5 | 6 | 0 | 0 | 1 | 1 | 6    | 13   | 2,64 | 4,38 | 750   |
| H317 | 6  | rp | 2 | 1 | 6 | 5 | 3 | 6 | 8 | 1 | 1 | 1 | 0 | 5    | 9    | 1,83 | 3,61 | 263,3 |
| H318 | 6  | rp | 2 | 1 | 5 | 4 | 3 | 5 | 6 | 1 | 1 | 1 | 1 | 8    | 11   | 3,77 | 3,66 | 255,7 |
| H319 | 6  | rp | 2 | 1 | 6 | 4 | 4 | 8 | 8 | 1 | 1 | 1 | 2 | 4    | 10   | 2,52 | 3,47 | 138,3 |
| H32  | 11 | rp | 1 | 1 | 7 | 5 | 2 | 8 | 8 | 1 | 1 | 1 | 2 | 6    | 13   | 2,45 | 3,08 |       |
| H320 | 6  | rp | 2 | 0 |   |   |   |   |   | 1 | 1 | 2 | 2 | 18   |      | 4,07 |      | 763,3 |
| H321 | 12 | r  | 2 | 1 | 8 | 4 | 3 | 8 | 8 | 1 | 1 | 1 | 0 | 6    | 19   | 2,35 | 3,51 | 341,7 |
| H322 | 6  | rp | 2 | 0 |   |   |   |   |   | 1 | 1 | 0 | 1 | 14,5 |      | 3,01 |      | 880   |
| H323 | 4  | rp | 2 | 0 |   |   |   |   |   | 0 | 0 | 0 | 0 | 17   |      | 3,89 |      | 586,7 |

|      |    |    |   |   |   |   |   |   |   |   |   |   |   |      |      |      |      |       |
|------|----|----|---|---|---|---|---|---|---|---|---|---|---|------|------|------|------|-------|
| H324 | 8  | r  | 2 | 0 |   |   |   |   |   | 1 | 1 | 0 | 1 | 16   |      | 3    |      | 833,3 |
| H325 | 7  | rp | 2 | 1 | 7 | 2 | 3 | 6 | 8 | 0 | 1 | 0 | 1 | 3    | 6    | 2,45 | 3,41 | 381,7 |
| H326 | 6  | rp | 2 | 1 | 5 | 5 | 3 | 6 | 8 | 0 | 0 | 1 | 2 | 4,5  | 12   | 3,38 | 3,67 | 231,7 |
| H327 | 6  | rp | 2 | 1 | 8 | 5 | 3 | 8 | 8 | 1 | 1 | 0 | 2 | 9,5  | 12   | 3,88 | 3,96 | 1360  |
| H328 | 12 | r  | 2 | 1 | 6 | 4 | 3 | 8 | 8 | 1 | 1 | 0 | 0 | 2    | 8    | 2,34 | 4,11 | 280   |
| H329 | 12 | r  | 2 | 1 | 5 | 5 | 2 | 6 | 6 | 0 | 0 | 1 | 1 | 10   | 19   | 3,12 | 4,27 | 1893  |
| H33  | 11 | rp | 1 | 1 | 8 | 5 | 3 | 8 | 8 | 1 | 1 | 1 | 0 | 4    | 14   | 3,03 | 3,9  |       |
| H330 | 12 | r  | 2 | 0 |   |   |   |   |   | 0 | 0 | 1 | 1 | 9    |      | 4,22 |      | 866,7 |
| H331 | 17 | p  | 2 | 1 | 5 |   | 3 | 7 | 8 | 1 | 1 | 2 | 0 | 2    | 4    | 2,68 | 3,13 | 866,7 |
| H332 | 7  | rp | 2 | 1 | 4 | 4 | 3 | 4 | 5 | 0 | 0 | 0 | 1 | 9    | 16,5 | 3,08 | 3,7  | 275,3 |
| H333 | 12 | r  | 2 | 1 | 5 | 4 | 3 | 4 | 6 | 1 | 0 | 0 | 1 | 3    | 10,5 | 2,6  | 3,95 | 256   |
| H334 | 17 | p  | 2 | 0 |   |   |   |   |   | 0 | 1 | 0 | 0 | 4    |      | 3,88 |      | 294,3 |
| H335 | 14 | p  | 2 | 1 | 8 | 3 | 2 | 7 | 8 | 1 | 0 | 2 | 0 | 11,5 | 14   | 3,86 | 4,91 | 471,7 |
| H336 | 14 | p  | 2 | 0 |   |   |   |   |   |   |   |   |   | 3    |      | 3,27 |      | 516,7 |
| H337 | 12 | r  | 2 | 1 | 4 | 4 | 3 | 4 | 6 | 1 | 1 | 0 | 1 | 3    | 13   | 3,1  | 4,23 | 209,3 |
| H338 | 12 | r  | 2 | 1 | 7 | 4 | 3 | 6 | 8 | 0 | 1 | 0 | 1 | 10   | 23   | 4,03 | 4,87 | 451,7 |
| H339 | 12 | r  | 2 | 1 | 8 | 3 | 2 | 5 | 6 | 0 | 0 | 1 | 0 | 12   | 17   | 4,06 | 3,81 | 550   |
| H34  | 11 | rp | 1 | 1 | 8 | 6 | 2 | 5 | 5 | 1 | 1 | 2 | 0 | 9,5  | 19,5 | 3,12 | 4,2  |       |
| H340 | 14 | p  | 2 | 0 |   |   |   |   |   | 1 | 1 | 1 | 0 | 18   |      | 5,13 |      | 840   |
| H341 | 14 | p  | 2 | 1 | 7 | 2 | 2 | 7 | 8 | 0 | 0 | 2 | 0 | 6    | 9    | 2,88 | 3,76 | 483,3 |
| H342 | 14 | p  | 2 | 0 |   |   |   |   |   | 0 | 1 | 1 | 0 | 9    |      | 4,73 |      | 1097  |
| H343 | 14 | p  | 2 | 0 |   |   |   |   |   | 1 | 0 | 2 | 0 | 14,5 |      | 5,3  |      | 996,7 |
| H344 | 5  | p  | 2 | 1 | 7 | 6 | 4 | 8 | 8 | 0 | 0 | 1 | 1 | 8,5  | 12   | 3,97 | 4,81 | 1363  |
| H345 | 5  | p  | 2 | 1 | 6 | 5 | 2 | 7 | 8 | 1 | 1 | 2 | 0 | 9    | 11   | 4,9  | 6,46 | 430   |
| H346 | 5  | p  | 2 | 0 |   |   |   |   |   | 1 | 1 | 1 | 0 | 14   |      | 4,23 |      | 1840  |
| H347 | 2  | p  | 2 | 1 | 7 | 4 | 2 | 6 | 8 | 0 | 0 | 1 | 0 | 8    | 11   | 3,95 | 5,22 | 383,3 |
| H348 | 16 | rp | 2 | 0 |   |   |   |   |   | 1 | 1 | 1 | 0 | 9    |      | 4,35 |      | 996,7 |
| H349 | 15 | r  | 2 | 0 |   |   |   |   |   | 0 | 1 | 1 | 0 | 6    |      | 4,03 |      | 219,3 |
| H35  | 11 | rp | 1 | 1 | 8 | 6 | 3 | 8 | 8 | 1 | 1 | 1 | 0 | 1,5  | 15   | 2,44 | 3,23 |       |
| H350 | 13 | p  | 2 | 0 |   |   |   |   |   | 1 | 0 | 1 | 0 | 6    |      | 3,05 |      | 563,3 |
| H351 | 15 | r  | 2 | 1 | 6 | 4 | 3 | 6 | 7 | 1 | 1 | 0 | 1 | 10,5 | 22   | 3,51 | 4,11 | 760   |

|      |    |    |   |   |   |   |   |   |   |   |   |   |   |      |      |      |      |       |
|------|----|----|---|---|---|---|---|---|---|---|---|---|---|------|------|------|------|-------|
| H352 | 15 | r  | 2 | 1 | 3 | 3 | 3 | 7 | 8 | 1 | 1 | 0 | 2 | 13,5 | 20   | 4,03 | 5,87 | 260,7 |
| H353 | 16 | rp | 2 | 1 | 3 | 4 | 4 | 8 | 8 | 1 | 1 | 1 | 0 | 14   | 19   | 3,4  | 6,1  | 278,7 |
| H354 | 15 | r  | 2 | 1 | 7 | 4 | 2 | 8 | 8 | 1 | 1 | 0 | 2 | 2    | 12   | 3,53 | 5,9  | 640   |
| H355 | 16 | rp | 2 | 1 | 3 | 4 | 2 | 4 | 4 | 1 | 0 | 0 | 0 | 7,5  | 12   | 3,29 | 4,48 | 388,3 |
| H356 | 13 | p  | 2 | 0 |   |   |   |   |   | 0 | 1 | 2 | 0 | 9    |      | 3,87 |      | 873,3 |
| H357 | 13 | p  | 2 | 0 |   |   |   |   |   | 0 | 1 | 2 | 0 | 9    |      | 3,61 |      | 3113  |
| H358 | 13 | p  | 2 | 1 | 4 | 6 | 3 | 8 | 8 | 0 | 0 | 1 | 0 | 4    | 7,5  | 2,17 | 3,11 | 500   |
| H359 | 10 | pr | 2 | 1 | 6 | 5 | 3 | 7 | 8 | 0 | 0 | 1 | 1 | 14   | 19,5 | 4,46 | 6,11 | 720   |
| H36  | 9  | r  | 1 | 1 | 8 | 5 | 3 | 7 | 8 | 0 | 1 | 0 | 2 | 10   | 31   | 4,98 | 6,03 |       |
| H360 | 5  | p  | 2 | 1 | 8 | 4 | 2 | 8 | 8 | 0 | 0 | 2 | 0 | 6    | 9,5  | 3,02 | 3,64 | 240   |
| H361 | 14 | p  | 2 | 1 | 4 | 5 | 2 | 6 | 7 | 0 | 0 | 1 | 0 | 11,5 | 15   | 4,23 | 5,92 | 274,7 |
| H362 | 10 | pr | 2 | 1 | 6 | 3 | 3 | 8 | 8 | 0 | 0 | 2 | 0 | 8,5  | 16   | 3,55 | 4,59 | 813,3 |
| H363 | 15 | r  | 2 | 1 | 7 | 4 | 3 | 4 | 6 | 1 | 1 | 0 | 2 | 8    | 15,5 | 3,84 | 3,82 | 1093  |
| H364 | 13 | p  | 2 | 0 |   |   |   |   |   | 1 | 0 | 2 | 0 | 5,5  |      | 3,11 |      | 387   |
| H365 | 13 | p  | 2 | 1 | 3 | 5 | 3 | 7 | 8 | 1 | 0 | 2 | 0 | 9    | 12   | 3,73 | 5,25 | 1327  |
| H366 | 13 | p  | 2 | 1 | 3 | 5 | 2 | 6 | 8 | 0 | 0 | 2 | 0 | 7,5  | 12   | 4,06 | 5,21 | 551,7 |
| H367 | 5  | p  | 2 | 1 | 3 | 5 | 4 | 7 | 8 | 0 | 0 | 2 | 0 | 9    | 23   | 5,67 | 7,32 | 1087  |
| H368 | 13 | p  | 2 | 1 | 2 | 6 | 3 | 8 | 8 | 1 | 1 | 2 | 0 | 8    | 16   | 4,55 | 6,86 | 468,3 |
| H369 | 2  | p  | 2 | 1 | 6 | 2 | 2 | 4 | 5 | 0 | 0 | 1 | 1 | 8    | 11   | 3,58 | 5,67 | 615   |
| H37  | 9  | r  | 1 | 1 | 5 | 5 | 2 | 4 | 4 | 1 | 1 | 1 | 1 | 10   | 32   | 3,66 | 4,5  |       |
| H370 | 15 | r  | 2 | 1 | 5 | 4 | 3 | 3 | 4 | 0 | 0 | 0 | 2 | 7    | 9    | 2,7  | 3,1  | 301,7 |
| H371 | 14 | p  | 2 | 1 | 5 | 6 | 3 | 7 | 8 | 0 | 0 | 2 | 1 | 6    | 12   | 4,11 | 5,41 | 673,3 |
| H372 | 5  | p  | 2 | 0 |   |   |   |   |   | 0 | 0 | 1 | 0 | 12,5 |      | 4,35 |      | 363,3 |
| H373 | 13 | p  | 2 | 1 | 5 | 6 | 3 | 7 | 8 | 0 | 0 | 1 | 0 | 7    | 23   | 2,75 | 4,36 | 298   |
| H374 | 5  | p  | 2 | 0 |   |   |   |   |   | 0 | 1 | 2 | 0 | 10   |      | 3,96 |      | 2147  |
| H375 | 16 | rp | 2 | 0 |   |   |   |   |   | 1 | 1 | 1 | 1 | 15   |      | 3,6  |      | 1113  |
| H376 | 16 | rp | 2 | 1 |   |   | 2 | 3 | 3 | 1 | 0 | 0 | 2 | 10,5 | 6,5  | 3,72 | 3,37 | 511,7 |
| H377 | 16 | rp | 2 | 1 |   | 4 | 2 | 3 | 3 | 1 | 1 | 0 | 2 | 10   | 5    | 4,78 | 4,4  | 1267  |
| H378 | 2  | p  | 2 | 0 |   |   |   |   |   | 1 | 0 | 1 | 1 | 9,5  |      | 3,9  |      | 873,3 |
| H379 | 13 | p  | 2 | 0 |   |   |   |   |   |   |   |   |   | 8    |      | 3,93 |      | 2340  |
| H38  | 14 | p  | 1 | 1 | 7 | 3 | 2 | 4 | 8 | 0 | 0 | 2 | 0 | 5    | 7    | 3,43 | 3,94 |       |

|      |    |    |   |   |   |   |   |   |   |   |   |   |   |      |      |      |      |       |
|------|----|----|---|---|---|---|---|---|---|---|---|---|---|------|------|------|------|-------|
| H380 | 16 | rp | 2 | 0 |   |   |   |   |   | 1 | 1 | 0 | 0 | 8    |      | 4,54 |      | 1947  |
| H381 | 14 | p  | 2 | 1 | 6 | 2 | 3 | 8 | 8 | 0 | 0 | 2 | 0 | 6,5  | 11,5 | 4,47 | 5,85 | 468,3 |
| H382 | 5  | p  | 2 | 1 | 5 | 6 | 4 | 8 | 8 | 1 | 1 | 2 | 0 | 4,5  | 7    | 3,35 | 8,35 | 573,3 |
| H383 | 5  | p  | 2 | 0 |   |   |   |   |   | 0 | 0 | 2 | 0 | 13   |      | 4,1  |      | 933,3 |
| H384 | 16 | rp | 2 | 0 |   |   |   |   |   | 0 | 0 | 0 | 1 | 8    |      | 3,78 |      | 1500  |
| H385 | 16 | rp | 2 | 0 |   |   |   |   |   | 1 | 1 | 2 | 0 | 14   |      | 4,13 |      | 1193  |
| H386 | 5  | p  | 2 | 1 | 7 | 5 | 3 | 7 | 8 | 1 | 1 | 1 | 0 | 3    | 8    | 2,82 | 3,86 | 488,3 |
| H387 | 13 | p  | 2 | 1 | 6 | 6 | 4 | 8 | 8 | 0 | 0 | 1 | 0 | 2,5  | 5    | 2,67 | 3,83 | 2297  |
| H388 | 5  | p  | 2 | 1 | 6 | 6 | 5 | 8 | 8 | 0 | 1 | 2 | 0 | 7    | 9    | 3,25 | 4,11 | 1987  |
| H389 | 13 | p  | 2 | 0 |   |   |   |   |   | 1 | 1 | 1 | 0 | 15   |      | 4,69 |      | 750   |
| H39  | 10 | pr | 1 | 1 | 7 | 6 | 3 | 7 | 8 | 1 | 1 | 1 | 2 | 2,5  | 5    | 2,14 | 3,4  |       |
| H391 | 5  | p  | 2 | 0 |   |   |   |   |   | 1 | 0 | 1 | 1 | 13   |      | 5,52 |      | 2880  |
| H392 | 5  | p  | 2 | 0 |   |   |   |   |   |   |   |   |   | 8    |      | 4,25 |      | 863,3 |
| H393 | 10 | pr | 2 | 0 |   |   |   |   |   | 0 | 0 | 1 | 0 | 11,5 |      | 3,37 |      | 2713  |
| H394 | 5  | p  | 2 | 1 | 7 | 4 | 4 | 8 | 8 | 1 | 0 | 2 | 0 | 4    | 8    | 3,07 | 3,95 | 806,7 |
| H395 | 13 | p  | 2 | 1 | 7 | 2 | 2 | 2 | 4 | 0 | 0 | 1 | 0 | 4    | 9,5  | 3,18 | 4,05 | 616,7 |
| H4   | 4  | rp | 1 | 1 | 8 | 5 | 3 | 5 | 6 | 0 | 0 | 2 | 0 | 8    | 16,5 | 2,48 | 4    |       |
| H40  | 10 | pr | 1 | 1 | 4 | 5 | 2 | 2 | 3 | 1 | 1 | 0 | 2 | 10   | 15,5 | 3,58 | 5,13 |       |
| H41  | 14 | p  | 1 | 1 | 7 | 4 | 2 | 8 | 8 | 0 | 0 | 2 | 0 | 13   | 15,5 | 4,51 | 5,57 |       |
| H42  | 14 | p  | 1 | 1 | 4 | 6 | 2 | 8 | 8 | 1 | 1 | 2 | 0 | 4    | 17,5 | 2,38 | 5,75 |       |
| H43  | 9  | r  | 1 | 1 | 8 | 5 | 2 | 6 | 8 | 1 | 1 | 0 | 2 | 9    | 19   | 2,93 | 4,34 |       |
| H44  | 9  | r  | 1 | 1 | 8 | 5 | 2 | 5 | 8 | 0 | 0 | 0 | 1 | 13   | 24   | 2,34 | 3,89 |       |
| H45  | 14 | p  | 1 | 1 | 7 | 6 | 2 | 5 | 3 | 0 | 0 | 2 | 0 | 4    | 7    | 3,47 | 5,35 |       |
| H46  | 10 | pr | 1 | 1 | 3 | 5 | 2 | 7 | 8 | 1 | 1 | 0 | 2 | 12   | 17   | 3,36 | 6,36 |       |
| H47  | 10 | pr | 1 | 1 | 4 | 6 | 3 | 6 | 8 | 0 | 1 | 2 | 1 | 10   | 28,5 | 2,2  | 4,35 |       |
| H48  | 10 | pr | 1 | 1 | 7 | 6 | 2 | 4 | 5 | 0 | 1 | 2 | 1 | 8    | 11,5 | 3,18 | 4,34 |       |
| H49  | 10 | pr | 1 | 1 | 7 | 6 | 3 | 6 | 8 | 0 | 0 | 2 | 0 | 12   | 33,5 | 3,78 | 5,91 |       |
| H5   | 4  | rp | 1 | 1 | 4 | 5 | 2 | 6 | 8 | 0 | 1 | 0 | 2 | 9    | 28   | 4,87 | 7,12 |       |
| H50  | 9  | r  | 1 | 1 | 8 | 6 | 2 | 8 | 8 | 0 | 0 | 1 | 2 | 8    | 20   | 4,19 | 4,98 |       |
| H51  | 3  | p  | 1 | 1 | 7 | 6 | 2 | 8 | 8 | 1 | 1 | 2 | 0 | 7    | 23   | 3,19 | 3,82 |       |
| H52  | 14 | p  | 1 | 1 | 7 | 3 | 2 | 6 | 8 | 0 | 0 | 2 | 0 | 5    | 9    | 2,57 | 3,27 |       |

|     |    |    |   |   |   |   |   |   |   |   |   |   |   |      |      |      |      |
|-----|----|----|---|---|---|---|---|---|---|---|---|---|---|------|------|------|------|
| H53 | 10 | pr | 1 | 1 | 6 | 5 | 2 | 5 | 8 | 1 | 1 | 1 | 1 | 5,5  | 22   | 4,52 | 6,26 |
| H54 | 10 | pr | 1 | 1 | 7 | 6 | 2 | 4 | 4 | 1 | 1 | 1 | 0 | 7    | 26   | 2,61 | 3,23 |
| H55 | 10 | pr | 1 | 1 | 7 | 5 | 2 | 4 | 5 | 0 | 1 | 0 | 2 | 10   | 18   | 4,28 | 5,53 |
| H56 | 10 | pr | 1 | 1 | 3 | 6 | 3 | 6 | 8 | 1 | 1 | 0 | 2 | 6    | 22   | 4,76 | 6,88 |
| H57 | 3  | p  | 1 | 1 | 7 | 6 | 2 | 8 | 8 | 0 | 0 | 2 | 0 | 1    | 6    | 2,5  | 2,66 |
| H58 | 3  | p  | 1 | 1 | 7 | 6 | 3 | 8 | 8 | 1 | 1 | 2 | 0 | 5    | 13   | 3,36 | 4,01 |
| H59 | 14 | p  | 1 | 1 | 7 | 5 | 2 | 4 | 8 | 1 | 0 | 2 | 0 | 7    | 13   | 5,25 | 5,88 |
| H6  | 4  | rp | 1 | 1 | 6 | 5 | 2 | 7 | 8 | 1 | 1 | 0 | 2 | 8    | 20   | 4,6  | 7,86 |
| H60 | 10 | pr | 1 | 1 | 4 | 5 | 2 | 3 | 5 | 1 | 1 | 2 | 1 | 8,5  | 15   | 4,04 | 4,78 |
| H61 | 10 | pr | 1 | 1 | 7 | 5 | 2 | 6 | 8 | 1 | 1 | 0 | 2 | 14,5 | 20   | 4,12 | 5,74 |
| H62 | 10 | pr | 1 | 1 | 6 | 3 | 2 | 2 | 3 | 0 | 0 | 0 | 2 | 7    | 12,5 | 3,99 | 3,36 |
| H63 | 2  | p  | 1 | 1 | 7 | 4 | 3 | 7 | 8 | 0 | 0 | 2 | 0 | 6    | 13   | 4,4  | 4,06 |
| H64 | 3  | p  | 1 | 1 | 5 | 6 | 3 | 7 | 7 | 0 | 0 | 1 | 2 | 5    | 23   | 2,4  | 4,59 |
| H65 | 3  | p  | 1 | 1 | 7 | 6 | 3 | 8 | 8 | 1 | 1 | 2 | 0 | 4,5  | 11,5 | 2,03 | 3,23 |
| H66 | 14 | p  | 1 | 1 | 7 | 5 | 2 | 6 | 7 | 0 | 0 | 2 | 0 | 9    | 11   | 4,06 | 5    |
| H67 | 2  | p  | 1 | 1 | 7 | 4 | 2 | 3 | 6 | 0 | 0 | 2 | 0 | 9,5  | 13   | 3,36 | 4,1  |
| H68 | 2  | p  | 1 | 1 | 7 | 5 | 3 | 8 | 8 | 0 | 0 | 1 | 0 | 12   | 17,5 | 4,07 | 6,45 |
| H69 | 2  | p  | 1 | 1 | 5 | 5 | 2 | 5 | 8 | 0 | 0 | 2 | 0 | 7    | 12,5 | 5,1  | 6,2  |
| H7  | 4  | rp | 1 | 1 | 5 | 6 | 4 | 8 | 8 | 0 | 0 | 0 | 2 | 18   | 42,5 | 5,02 | 7,1  |
| H70 | 2  | p  | 1 | 1 | 7 | 5 | 2 | 5 | 5 | 1 | 0 | 2 | 0 | 13   | 24   | 3,71 | 5,01 |
| H71 | 3  | p  | 1 | 1 | 7 | 6 | 3 | 8 | 8 | 1 | 0 | 2 | 1 | 4    | 10   | 2,55 | 4,12 |
| H72 | 3  | p  | 1 | 0 |   |   |   |   |   |   |   |   |   |      |      |      |      |
| H73 | 14 | p  | 1 | 1 | 7 | 5 | 2 | 3 | 4 | 0 | 0 | 2 | 0 | 6,5  | 11   | 2,85 | 3,95 |
| H74 | 2  | p  | 1 | 1 | 5 | 5 | 2 | 5 | 8 | 0 | 0 | 2 | 0 | 6,5  | 21   | 3,39 | 4,7  |
| H75 | 2  | p  | 1 | 1 | 7 | 5 | 3 | 6 | 8 | 1 | 1 | 2 | 0 | 10   | 15,5 | 3,23 | 4,31 |
| H76 | 2  | p  | 1 | 1 | 7 | 5 | 2 | 6 | 8 | 0 | 0 | 2 | 0 | 10   | 17   | 4,05 | 5,36 |
| H77 | 2  | p  | 1 | 1 | 7 | 3 | 2 | 4 | 5 | 0 | 0 | 2 | 0 | 10   | 18,5 | 3,6  | 4,38 |
| H78 | 3  | p  | 1 | 1 | 8 | 6 | 2 | 8 | 8 | 1 | 0 | 1 | 0 | 6,5  | 10   | 3,48 | 3,37 |
| H79 | 3  | p  | 1 | 1 | 8 | 6 | 2 | 8 | 8 | 0 | 0 | 2 | 0 | 7    | 10   | 3,42 | 3,43 |
| H8  | 9  | r  | 1 | 1 | 8 | 6 | 2 | 6 | 8 | 0 | 0 | 0 | 2 | 7    | 13   | 1,58 | 2,55 |
| H80 | 14 | p  | 1 | 1 | 7 | 4 | 2 | 5 | 8 | 1 | 1 | 2 | 2 | 16,5 | 8,5  | 4    | 4,78 |

|     |    |    |   |   |   |   |   |   |   |   |   |   |   |      |      |      |      |
|-----|----|----|---|---|---|---|---|---|---|---|---|---|---|------|------|------|------|
| H81 | 2  | p  | 1 | 1 | 8 | 5 | 2 | 5 | 5 | 0 | 0 | 1 | 1 | 12,5 | 17   | 4,52 | 4,23 |
| H82 | 1  | r  | 1 | 1 | 4 | 6 | 2 | 6 | 8 | 1 | 0 | 0 | 2 | 29   | 56,5 | 6    | 7,4  |
| H83 | 1  | r  | 1 | 1 | 4 | 5 | 3 | 6 | 7 | 1 | 1 | 0 | 2 | 18   | 46   | 5,08 | 6,85 |
| H84 | 1  | r  | 1 | 1 | 3 | 4 | 3 | 4 | 5 | 1 | 1 | 0 | 2 | 19   | 4    | 4,1  | 6,51 |
| H85 | 3  | p  | 1 | 1 | 4 | 6 | 2 | 3 | 6 | 1 | 0 | 2 | 0 | 8    | 12,5 | 3,15 | 4,32 |
| H86 | 14 | p  | 1 | 1 | 7 | 6 | 2 | 6 | 8 | 0 | 0 | 2 | 0 | 11,5 | 17   | 4,68 | 6,68 |
| H87 | 14 | p  | 1 | 1 | 7 | 6 | 2 | 6 | 8 | 0 | 0 | 2 | 1 | 13,5 | 19,5 | 3,9  | 5,96 |
| H88 | 2  | p  | 1 | 1 | 8 | 4 | 2 | 6 | 8 | 0 | 0 | 1 | 0 | 9,5  | 12,5 | 3,53 | 4,25 |
| H89 | 1  | r  | 1 | 1 | 5 | 6 | 3 | 7 | 8 | 1 | 1 | 0 | 2 | 29   | 37   | 4,32 | 6,08 |
| H9  | 4  | rp | 1 | 1 | 7 | 4 | 4 | 7 | 7 | 1 | 1 | 0 | 2 | 7,5  | 38   | 3,45 | 6,27 |
| H90 | 1  | r  | 1 | 1 | 4 | 6 | 3 | 8 | 8 | 1 | 1 | 0 | 2 | 27   | 39   | 5,56 | 7,05 |
| H91 | 1  | r  | 1 | 1 | 7 | 4 | 3 | 4 | 5 | 1 | 1 | 0 | 2 | 19   | 29,5 | 5,93 | 6,81 |
| H92 | 3  | p  | 1 | 1 | 8 | 6 | 2 | 8 | 8 | 1 | 0 | 1 | 0 | 6,5  | 12   | 3,62 | 5,26 |
| H93 | 14 | p  | 1 | 1 | 7 | 4 | 2 | 8 | 8 | 1 | 1 | 2 | 0 | 9    | 21   | 2,69 | 3,67 |
| H94 | 14 | p  | 1 | 1 | 8 | 4 | 2 | 8 | 8 | 1 | 0 | 2 | 0 | 11,5 | 15   | 3,32 | 4,71 |
| H95 | 2  | p  | 1 | 1 | 7 | 5 | 3 | 7 | 8 | 0 | 0 | 2 | 0 | 8,5  | 12   | 3,27 | 4,12 |
| H96 | 1  | r  | 1 | 1 | 7 | 5 | 4 | 8 | 8 | 1 | 1 | 0 | 2 | 28   | 37,5 | 3,1  | 7,44 |
| H97 | 1  | r  | 1 | 1 | 6 | 5 | 3 | 7 | 8 | 1 | 1 | 0 | 2 | 30   | 40   | 5,46 | 6,27 |
| H98 | 1  | r  | 1 | 1 | 6 | 6 | 2 | 7 | 8 | 1 | 1 | 0 | 2 | 17,5 | 24   | 5,07 | 6,23 |
| H99 | 13 | p  | 1 | 1 | 4 | 6 | 2 | 6 | 8 | 0 | 1 | 2 | 0 | 6,5  | 15   | 4,07 | 5,94 |

---

| plID | W134  | W141  | W148  | W155  | W161  | W169  | W182  | W218 | W225 | W247 | W254 | W261 | W268 | W275 | W281 | W290 | W295 | W302 | WC182 | WC268 | WC275 | WC281 | WC290 | WC295 |
|------|-------|-------|-------|-------|-------|-------|-------|------|------|------|------|------|------|------|------|------|------|------|-------|-------|-------|-------|-------|-------|
| H1   | 865,3 | 733,7 | 628,9 | 792,9 | 672,2 | 600,2 | 570,3 | 730  | 648  | 471  | 464  | 505  | 580  | 591  | 513  | 691  | 712  | 682  |       |       |       |       |       |       |
| H10  | 884,1 | 758,5 | 652,9 | 808,9 | 682,7 | 593   | 510,7 | 686  | 585  | 416  | 392  | 482  | 412  | 419  | 366  | 650  | 673  | 634  |       |       |       |       |       |       |
| H100 | 775,7 | 645,6 | 575,2 | 746   | 679,8 | 575,1 | 456,3 | 708  | 643  | 501  | 459  | 547  | 503  | 314  | 565  | 586  | 619  | 586  |       |       |       |       |       |       |
| H101 | 777,8 | 658,4 | 586,6 | 749,4 | 672,8 | 602,9 | 485,1 | 687  | 640  | 472  | 444  | 485  | 448  | 529  | 483  | 536  | 547  | 516  |       |       |       |       |       |       |
| H102 | 848,3 | 703,2 | 617,1 | 821,8 | 741,2 | 667,8 | 494,9 | 769  | 711  | 624  | 625  | 594  | 531  | 624  | 568  | 575  | 629  | 589  |       |       |       |       |       |       |
| H103 | 868,1 | 750,1 | 686,2 | 854,5 | 795,6 | 732   | 641,6 | 846  | 802  | 746  | 749  | 708  | 674  | 736  | 698  | 738  | 765  | 731  |       |       |       |       |       |       |
| H104 | 860,5 | 725,3 | 642,9 | 833,7 | 748,7 | 685   | 576,6 | 814  | 737  | 573  | 595  | 622  | 558  | 621  | 561  | 670  | 667  | 629  |       |       |       |       |       |       |
| H105 | 865,3 | 738,8 | 660,5 | 827,4 | 745,3 | 690,3 | 580   | 822  | 763  | 647  | 626  | 642  | 605  | 642  | 601  | 654  | 654  | 625  |       |       |       |       |       |       |
| H106 | 747,5 | 639   | 569,1 | 716,7 | 662,8 | 623,6 | 522,6 | 692  | 644  | 561  | 576  | 594  | 636  | 662  | 630  | 659  | 668  | 644  |       |       |       |       |       |       |
| H107 | 780,8 | 683,5 | 621   | 756,4 | 686,1 | 622,8 | 485,6 | 678  | 622  | 549  | 551  | 529  | 510  | 608  | 571  | 638  | 663  | 640  |       |       |       |       |       |       |
| H108 | 765,9 | 654,1 | 579,3 | 776,4 | 696   | 637,4 | 469,9 | 699  | 632  | 454  | 412  | 439  | 413  | 454  | 416  | 493  | 561  | 533  |       |       |       |       |       |       |
| H109 | 785,1 | 697,7 | 639,4 | 786,8 | 725   | 684,2 | 538,6 | 723  | 677  | 645  | 629  | 610  | 586  | 629  | 594  | 655  | 681  | 658  |       |       |       |       |       |       |
| H11  | 876,9 | 750,9 | 648,1 | 819,9 | 675,2 | 587,7 | 476,8 | 709  | 616  | 412  | 397  | 474  | 416  | 423  | 368  | 628  | 638  | 600  |       |       |       |       |       |       |
| H110 | 895,5 | 802,7 | 732,1 | 890,4 | 825,1 | 764,2 | 678,9 | 861  | 813  | 752  | 759  | 732  | 699  | 796  | 725  | 766  | 779  | 757  |       |       |       |       |       |       |
| H111 | 846,2 | 732,6 | 654   | 831,8 | 743,1 | 630,5 | 473,5 | 754  | 684  | 573  | 594  | 597  | 535  | 553  | 507  | 566  | 562  | 530  |       |       |       |       |       |       |
| H112 | 850,8 | 738   | 640,6 | 823,8 | 732,5 | 683,8 | 563,7 | 791  | 712  | 626  | 586  | 573  | 523  | 635  | 587  | 630  | 628  | 599  |       |       |       |       |       |       |
| H113 | 801,7 | 681,5 | 613,9 | 769,5 | 680,3 | 586,5 | 427,2 | 692  | 630  | 531  | 506  | 445  | 444  | 447  | 406  | 430  | 478  | 454  |       |       |       |       |       |       |
| H114 | 786,4 | 694,4 | 628,7 | 771,6 | 715,6 | 670,4 | 517   | 716  | 661  | 655  | 638  | 608  | 632  | 645  | 614  | 685  | 705  | 683  |       |       |       |       |       |       |
| H115 | 788,6 | 698,1 | 633,7 | 788   | 713,9 | 679,5 | 470,6 | 710  | 645  | 439  | 369  | 573  | 540  | 531  | 491  | 543  | 625  | 598  |       |       |       |       |       |       |
| H116 | 762,6 | 675,5 | 617,7 | 749   | 685   | 657,5 | 505,5 | 703  | 648  | 598  | 576  | 569  | 534  | 515  | 481  | 538  | 595  | 573  |       |       |       |       |       |       |
| H117 | 875,1 | 789   | 729,1 | 866   | 806,1 | 774,4 | 717,5 | 826  | 774  | 733  | 720  | 711  | 682  | 701  | 669  | 680  | 724  | 705  |       |       |       |       |       |       |
| H118 | 877,7 | 771,8 | 681,1 | 851,8 | 760,2 | 663,7 | 486,1 | 763  | 685  | 457  | 534  | 561  | 503  | 578  | 525  | 516  | 561  | 527  |       |       |       |       |       |       |
| H119 | 881,6 | 790,6 | 708,9 | 860,5 | 777,7 | 745,2 | 711,6 | 843  | 768  | 713  | 681  | 673  | 633  | 722  | 681  | 719  | 722  | 697  |       |       |       |       |       |       |
| H12  | 805,6 | 679,3 | 587,9 | 765,6 | 680,7 | 658,2 | 609,9 | 769  | 709  | 672  | 668  | 706  | 707  | 731  | 690  | 739  | 749  | 726  |       |       |       |       |       |       |
| H120 | 872,1 | 727,5 | 637   | 837   | 772,5 | 532,6 | 375,6 | 622  | 550  | 486  | 505  | 527  | 481  | 473  | 431  | 425  | 449  | 423  |       |       |       |       |       |       |
| H121 | 873,8 | 768,9 | 692,1 | 854,8 | 781,3 | 690,8 | 552,1 | 792  | 745  | 719  | 714  | 700  | 678  | 670  | 642  | 669  | 734  | 716  |       |       |       |       |       |       |
| H122 | 872   | 776,2 | 700,7 | 875,3 | 806,3 | 777,8 | 631,6 | 829  | 777  | 680  | 662  | 669  | 644  | 644  | 612  | 642  | 706  | 687  |       |       |       |       |       |       |
| H123 | 847,2 | 753,1 | 685,7 | 858,8 | 795,3 | 767,4 | 623,7 | 838  | 784  | 743  | 725  | 713  | 689  | 683  | 654  | 695  | 732  | 714  |       |       |       |       |       |       |
| H124 | 899,5 | 799,2 | 718,5 | 889   | 814,9 | 776,8 | 676,8 | 866  | 802  | 740  | 722  | 713  | 662  | 657  | 621  | 618  | 679  | 659  |       |       |       |       |       |       |
| H125 | 846,7 | 748,2 | 667,5 | 839,1 | 759,1 | 698,8 | 596,3 | 807  | 747  | 632  | 630  | 348  | 615  | 626  | 592  | 602  | 607  | 587  |       |       |       |       |       |       |

|      |       |       |       |       |       |       |       |     |     |     |     |     |     |     |     |     |     |     |
|------|-------|-------|-------|-------|-------|-------|-------|-----|-----|-----|-----|-----|-----|-----|-----|-----|-----|-----|
| H127 | 821,2 | 688,7 | 607,5 | 840,2 | 735,5 | 578,1 | 430,8 | 725 | 663 | 535 | 587 | 607 | 564 | 562 | 527 | 530 | 589 | 563 |
| H128 | 806,3 | 700,8 | 627,1 | 868,3 | 803,5 | 711,7 | 576,5 | 835 | 789 | 754 | 756 | 740 | 720 | 719 | 690 | 712 | 756 | 735 |
| H129 | 844,5 | 729,1 | 655,1 | 859,2 | 767   | 654,4 | 454,6 | 790 | 728 | 588 | 565 | 635 | 584 | 568 | 528 | 533 | 596 | 565 |
| H13  | 847,5 | 713,7 | 616,9 | 801,4 | 686,8 | 653,2 | 621   | 832 | 745 | 682 | 710 | 691 | 643 | 716 | 657 | 660 | 674 | 635 |
| H130 | 809,9 | 681   | 584,4 | 838,9 | 743   | 667,8 | 455,6 | 775 | 717 | 669 | 650 | 735 | 673 | 651 | 611 | 609 | 695 | 671 |
| H131 | 740,6 | 659   | 605   | 776,2 | 723,4 | 678,7 | 626,3 | 769 | 705 | 636 | 605 | 597 | 536 | 534 | 490 | 479 | 544 | 520 |
| H132 | 805   | 731   | 676,9 | 813,5 | 754,6 | 698,8 | 712,3 | 810 | 726 | 585 | 546 | 546 | 453 | 458 | 398 | 363 | 372 | 335 |
| H133 | 755,1 | 648,5 | 560,7 | 731,9 | 598,1 | 480,8 | 370,8 | 672 | 581 | 541 | 502 | 566 | 447 | 605 | 525 | 524 | 540 | 498 |
| H134 | 718,2 | 625,1 | 563,9 | 727,8 | 672,6 | 590,1 | 517   | 688 | 626 | 546 | 586 | 587 | 579 | 584 | 548 | 570 | 606 | 589 |
| H135 | 732,6 | 637,3 | 561,9 | 730,1 | 646,4 | 521   | 380,1 | 686 | 627 | 489 | 509 | 484 | 433 | 407 | 366 | 359 | 367 | 342 |
| H136 | 755,8 | 661,8 | 573,7 | 745,4 | 658,6 | 566,4 | 385,2 | 662 | 603 | 426 | 345 | 567 | 507 | 481 | 437 | 419 | 425 | 400 |
| H137 | 798,7 | 716,9 | 658,3 | 802,8 | 735,2 | 698,8 | 568,6 | 753 | 704 | 629 | 618 | 666 | 614 | 591 | 555 | 540 | 542 | 522 |
| H138 | 826,8 | 721,9 | 637,5 | 853,2 | 786,2 | 725,5 | 648,2 | 863 | 808 | 738 | 724 | 728 | 680 | 659 | 626 | 597 | 603 | 584 |
| H139 | 842   | 733,3 | 643,8 | 824,2 | 726,7 | 626,4 | 607,1 | 805 | 734 | 668 | 655 | 701 | 640 | 661 | 612 | 586 | 606 | 579 |
| H14  | 854,8 | 699,7 | 580,3 | 774,4 | 619   | 536,8 | 544,6 | 800 | 669 | 551 | 593 | 600 | 596 | 666 | 595 | 593 | 604 | 553 |
| H140 | 961,2 | 825,5 | 717,1 | 896,1 | 762,2 | 638,8 | 523,8 | 857 | 751 | 740 | 724 | 829 | 737 | 826 | 742 | 721 | 753 | 708 |
| H141 | 937   | 808,2 | 712,2 | 909,1 | 802,9 | 659,4 | 512,8 | 861 | 800 | 663 | 778 | 842 | 820 | 827 | 787 | 828 | 841 | 809 |
| H142 | 859,2 | 751,8 | 673,9 | 869,6 | 801,1 | 708,3 | 594,5 | 855 | 809 | 705 | 743 | 778 | 762 | 758 | 730 | 768 | 768 | 751 |
| H143 | 919,4 | 930,9 | 761   | 903,6 | 830,4 | 768,3 | 652,1 | 876 | 830 | 712 | 720 | 747 | 723 | 710 | 681 | 682 | 683 | 667 |
| H144 | 856,6 | 758,5 | 686,3 | 839   | 749,2 | 690   | 526,9 | 834 | 750 | 625 | 622 | 644 | 599 | 583 | 546 | 534 | 534 | 513 |
| H145 | 804,8 | 707,5 | 630,6 | 814,8 | 743,2 | 681,2 | 601,4 | 815 | 762 | 658 | 667 | 690 | 646 | 624 | 591 | 568 | 593 | 573 |
| H146 | 802,3 | 705   | 627,2 | 817,9 | 719,8 | 628,1 | 669,3 | 833 | 757 | 702 | 691 | 727 | 680 | 654 | 312 | 589 | 604 | 576 |
| H147 | 956,6 | 863   | 790,5 | 905,7 | 827,8 | 782,3 | 788,8 | 907 | 852 | 863 | 841 | 877 | 851 | 868 | 825 | 825 | 861 | 833 |
| H148 | 979,8 | 833,3 | 736   | 927,8 | 823,8 | 690,5 | 533,8 | 913 | 841 | 677 | 807 | 857 | 840 | 824 | 788 | 862 | 872 | 839 |
| H149 | 831,8 | 742,1 | 676,2 | 840   | 753,8 | 654   | 537,9 | 828 | 777 | 685 | 718 | 749 | 734 | 734 | 703 | 762 | 762 | 744 |
| H15  | 967,1 | 829,7 | 725,6 | 875,4 | 784,3 | 723,1 | 629,8 | 853 | 783 | 624 | 638 | 768 | 759 | 773 | 736 | 866 | 876 | 849 |
| H150 | 880,2 | 788,2 | 725   | 856,7 | 790,9 | 742   | 625,1 | 852 | 810 | 696 | 741 | 783 | 780 | 805 | 780 | 806 | 816 | 800 |
| H151 | 933,8 | 837,4 | 771,5 | 899,3 | 832,7 | 797,4 | 655,4 | 887 | 850 | 760 | 767 | 824 | 781 | 814 | 786 | 831 | 845 | 826 |
| H152 | 844,9 | 752,8 | 671,3 | 814,7 | 741,9 | 702,8 | 648,1 | 816 | 762 | 611 | 633 | 754 | 703 | 732 | 699 | 689 | 755 | 734 |
| H153 | 966   | 827,5 | 715,3 | 919,6 | 787,3 | 646,7 | 583,6 | 929 | 851 | 701 | 754 | 826 | 756 | 746 | 690 | 689 | 731 | 692 |
| H154 | 937,7 | 806,3 | 684   | 858,8 | 713,1 | 569,9 | 507,5 | 777 | 686 | 589 | 711 | 780 | 710 | 706 | 633 | 687 | 731 | 678 |



|      |       |       |       |        |       |       |       |     |     |     |     |     |     |     |     |     |     |     |
|------|-------|-------|-------|--------|-------|-------|-------|-----|-----|-----|-----|-----|-----|-----|-----|-----|-----|-----|
| H155 | 867,9 | 739,9 | 661,4 | 824,3  | 749   | 651,8 | 513,7 | 792 | 742 | 560 | 639 | 658 | 643 | 651 | 627 | 741 | 760 | 734 |
| H156 | 946,3 | 833,9 | 746,5 | 910,8  | 793,8 | 640,7 | 490   | 861 | 796 | 580 | 664 | 747 | 698 | 677 | 630 | 728 | 750 | 723 |
| H157 | 925   | 792,5 | 671,9 | 888,1  | 777,2 | 685   | 506,7 | 867 | 794 | 576 | 681 | 822 | 785 | 822 | 779 | 834 | 855 | 827 |
| H158 | 908,7 | 808,2 | 726,7 | 870,6  | 784,4 | 767,1 | 618,8 | 861 | 813 | 732 | 740 | 859 | 811 | 846 | 815 | 843 | 856 | 836 |
| H159 | 899,5 | 790   | 708,9 | 853,4  | 758,4 | 668,5 | 531,3 | 817 | 757 | 538 | 542 | 785 | 731 | 774 | 736 | 767 | 808 | 782 |
| H16  | 855,9 | 753,3 | 674,2 | 823,8  | 750,7 | 720,1 | 631,6 | 839 | 783 | 764 | 774 | 831 | 823 | 841 | 812 | 860 | 868 | 846 |
| H160 | 952,7 | 833,2 | 732,2 | 885,6  | 769,3 | 649,5 | 569,7 | 890 | 828 | 620 | 664 | 722 | 673 | 697 | 649 | 743 | 813 | 781 |
| H161 | 953,4 | 837,2 | 735,3 | 882,8  | 776,7 | 665,5 | 569,5 | 845 | 778 | 586 | 700 | 742 | 691 | 677 | 629 | 711 | 785 | 756 |
| H162 | 855   | 746,5 | 676,1 | 825,9  | 760,7 | 676,5 | 564,6 | 801 | 760 | 663 | 724 | 766 | 755 | 754 | 732 | 790 | 802 | 779 |
| H163 | 923,9 | 797,2 | 704,8 | 883,5  | 774,6 | 648   | 502,9 | 847 | 791 | 629 | 710 | 694 | 651 | 646 | 610 | 628 | 654 | 627 |
| H164 | 907,2 | 804,7 | 731,2 | 878,1  | 796,1 | 734,6 | 607,5 | 876 | 827 | 699 | 732 | 803 | 759 | 772 | 736 | 776 | 812 | 785 |
| H165 | 824,7 | 733,6 | 667,2 | 809,6  | 754,3 | 755,3 | 645,9 | 829 | 787 | 717 | 732 | 777 | 745 | 748 | 724 | 759 | 777 | 762 |
| H166 | 902   | 792,6 | 713   | 852,1  | 773,8 | 712,5 | 620,4 | 861 | 811 | 726 | 703 | 753 | 706 | 686 | 655 | 689 | 704 | 688 |
| H167 | 888   | 801,4 | 732,7 | 859,3  | 794   | 736,9 | 668,2 | 840 | 788 | 764 | 739 | 745 | 716 | 729 | 696 | 767 | 793 | 765 |
| H168 | 898,7 | 816,5 | 743,4 | 861,6  | 791,1 | 737,8 | 643,5 | 869 | 818 | 810 | 805 | 822 | 802 | 825 | 791 | 829 | 857 | 820 |
| H169 | 957,6 | 817,9 | 722,5 | 870,7  | 783,6 | 695,1 | 536,5 | 797 | 739 | 614 | 645 | 826 | 800 | 775 | 743 | 827 | 841 | 814 |
| H17  | 935,7 | 822,5 | 735,9 | 887,1  | 798,1 | 747,6 | 630,6 | 902 | 830 | 720 | 759 | 799 | 759 | 801 | 760 | 856 | 866 | 838 |
| H170 | 904,5 | 795   | 711   | 862,9  | 752,8 | 647   | 497,1 | 784 | 720 | 533 | 576 | 631 | 578 | 542 | 501 | 687 | 711 | 680 |
| H171 | 889,1 | 788,7 | 708,6 | 861,9  | 791,3 | 758,6 | 635   | 845 | 797 | 660 | 677 | 667 | 630 | 613 | 583 | 640 | 642 | 619 |
| H172 | 873,2 | 798,5 | 725,5 | 861,1  | 804,1 | 809,9 | 710,8 | 858 | 821 | 725 | 764 | 745 | 715 | 709 | 687 | 704 | 702 | 686 |
| H173 | 833,8 | 729,9 | 641,8 | 792,4  | 683,6 | 625,5 | 497   | 752 | 685 | 495 | 497 | 449 | 399 | 369 | 339 | 355 | 356 | 337 |
| H174 | 899,6 | 799,1 | 718,2 | 847,2  | 751,5 | 678,8 | 611,8 | 825 | 771 | 727 | 687 | 663 | 636 | 605 | 575 | 610 | 625 | 604 |
| H175 | 940   | 829,3 | 735,3 | 861,6  | 778,6 | 699   | 590   | 795 | 754 | 703 | 660 | 634 | 632 | 616 | 575 | 661 | 713 | 687 |
| H176 | 893,4 | 764,3 | 677,2 | 813,3  | 742,1 | 684,8 | 593,2 | 789 | 748 | 617 | 628 | 739 | 715 | 708 | 681 | 746 | 778 | 754 |
| H177 | 935,7 | 808,3 | 712,5 | 843    | 718,2 | 598,9 | 452,1 | 717 | 654 | 487 | 510 | 683 | 632 | 587 | 541 | 568 | 593 | 559 |
| H178 | 887,2 | 800,3 | 728,9 | 851,8  | 773,7 | 765   | 677   | 837 | 804 | 749 | 766 | 838 | 815 | 794 | 768 | 775 | 778 | 757 |
| H179 | 834,7 | 737,2 | 667,1 | 813,9  | 747   | 747   | 649,8 | 815 | 779 | 694 | 722 | 750 | 711 | 690 | 665 | 669 | 669 | 651 |
| H18  | 949,3 | 834,2 | 745,2 | 912    | 821,4 | 771,4 | 621,1 | 915 | 862 | 782 | 798 | 799 | 762 | 801 | 765 | 871 | 881 | 858 |
| H180 | 963,1 | 876   | 805,9 | 927,63 | 850,6 | 795   | 762,6 | 918 | 872 | 745 | 778 | 810 | 768 | 744 | 718 | 728 | 718 | 700 |
| H181 | 879,5 | 784,4 | 706,4 | 833,9  | 744,1 | 656,8 | 606,3 | 794 | 739 | 685 | 628 | 736 | 691 | 659 | 624 | 634 | 639 | 617 |
| H182 | 871,9 | 759,8 | 668   | 814,1  | 718,3 | 649,1 | 554,6 | 779 | 717 | 664 | 649 | 757 | 715 | 688 | 649 | 688 | 730 | 704 |

[illegible]

|      |        |       |       |       |       |       |       |     |     |     |     |     |     |     |     |     |     |     |   |   |   |   |   |
|------|--------|-------|-------|-------|-------|-------|-------|-----|-----|-----|-----|-----|-----|-----|-----|-----|-----|-----|---|---|---|---|---|
| H210 | 824,8  | 707,2 | 605,8 | 490,4 | 402,4 | 322,3 | 256,1 | 810 | 736 | 374 | 288 | 245 | 221 | 214 | 209 | 208 | 208 | 508 | 1 | 1 | 1 | 1 | 1 |
| H211 | 822,4  | 729,5 | 656,1 | 577,4 | 495,2 | 401,1 | 288,4 | 824 | 763 | 487 | 395 | 321 | 267 | 241 | 226 | 214 | 210 | 553 |   |   |   |   |   |
| H212 | 881,1  | 783,5 | 696,5 | 597,3 | 497   | 388,9 | 280,7 | 869 | 799 | 508 | 420 | 349 | 293 | 259 | 239 | 225 | 219 | 574 |   |   |   | 1 | 1 |
| H213 | 837,2  | 771,4 | 722,4 | 672,2 | 618,2 | 540,6 | 424,8 | 853 | 809 | 663 | 600 | 537 | 481 | 440 | 411 | 381 | 367 | 761 |   |   |   |   |   |
| H214 | 887,4  | 807,8 | 743,9 | 684,9 | 621,8 | 525,5 | 408,1 | 863 | 804 | 618 | 550 | 483 | 436 | 400 | 374 | 342 | 327 | 731 |   |   |   |   |   |
| H215 | 858,8  | 754,9 | 672,4 | 579,9 | 484,8 | 379,9 | 269,9 | 822 | 764 | 462 | 367 | 293 | 246 | 223 | 212 | 204 | 201 | 540 |   |   |   | 1 | 1 |
| H216 | 931,6  | 826,8 | 746,7 | 660,4 | 574,9 | 458,3 | 324,8 | 893 | 837 | 530 | 437 | 354 | 293 | 268 | 256 | 246 | 243 | 607 |   |   |   | 1 | 1 |
| H217 | 894,5  | 789,6 | 709,3 | 615,2 | 528,2 | 416,3 | 301,6 | 867 | 802 | 450 | 364 | 287 | 245 | 225 | 212 | 203 | 200 | 533 |   |   |   | 1 | 1 |
| H218 | 969,6  | 832,5 | 716,1 | 589,8 | 473,3 | 359,9 | 273   | 883 | 777 | 384 | 292 | 257 | 239 | 235 | 232 | 238 | 236 | 634 | 1 | 1 | 1 | 1 | 1 |
| H219 | 959,5  | 854,4 | 769   | 686,6 | 596,6 | 483,6 | 361,7 | 943 | 878 | 565 | 477 | 398 | 333 | 295 | 274 | 259 | 253 | 627 |   |   |   |   |   |
| H22  | 893,3  | 783,3 | 704,1 | 840,3 | 763,1 | 685,1 | 593,7 | 793 | 736 | 605 | 622 | 657 | 668 | 693 | 664 | 783 | 789 | 765 |   |   |   |   |   |
| H220 | 914,4  | 793,7 | 694,8 | 587,7 | 491   | 401,5 | 306,7 | 907 | 855 | 532 | 435 | 353 | 293 | 267 | 252 | 245 | 239 | 559 |   |   |   | 1 | 1 |
| H221 | 940,2  | 828,3 | 721,3 | 618   | 529   | 437,4 | 343,3 | 947 | 888 | 576 | 483 | 408 | 351 | 317 | 298 | 285 | 280 | 661 |   |   |   | 1 | 1 |
| H222 | 1011,7 | 899,5 | 803,3 | 692   | 569,3 | 438,8 | 330,2 | 963 | 915 | 506 | 404 | 329 | 296 | 283 | 277 | 272 | 269 | 628 |   |   | 1 | 1 | 1 |
| H223 | 986,7  | 858,3 | 748,6 | 616,9 | 487,5 | 364,2 | 279,2 | 945 | 890 | 437 | 322 | 276 | 255 | 250 | 245 | 241 | 239 | 650 | 1 | 1 | 1 | 1 | 1 |
| H224 | 878    | 755,8 | 666,8 | 570,5 | 484,2 | 391,9 | 290,2 | 845 | 785 | 397 | 317 | 257 | 227 | 217 | 210 | 204 | 203 | 546 |   |   | 1 | 1 | 1 |
| H225 | 947,3  | 827,3 | 736,5 | 643,4 | 546,3 | 428,8 | 310,7 | 909 | 855 | 626 | 513 | 475 | 339 | 297 | 262 | 238 | 231 | 647 |   |   |   | 1 | 1 |
| H226 | 928,3  | 821,1 | 738,2 | 658,5 | 576,8 | 460,2 | 319,3 | 889 | 839 | 660 | 555 | 476 | 411 | 360 | 324 | 288 | 271 | 709 |   |   |   |   |   |
| H227 | 929,9  | 829,4 | 743,5 | 654,1 | 563,1 | 443,2 | 314,6 | 913 | 861 | 693 | 579 | 524 | 532 | 529 | 532 | 471 | 441 | 888 |   |   |   |   |   |
| H228 | 991,7  | 880,6 | 787,5 | 686,9 | 591,7 | 485,9 | 380,4 | 975 | 927 | 609 | 520 | 444 | 386 | 352 | 333 | 317 | 312 | 685 |   |   |   |   |   |
| H229 | 829,3  | 739,9 | 666,4 | 592,2 | 514,8 | 424,5 | 325,4 | 863 | 800 | 484 | 408 | 340 | 294 | 269 | 254 | 242 | 237 | 536 |   |   |   |   |   |
| H23  | 889,9  | 766   | 677,8 | 821,8 | 731,8 | 652   | 540,7 | 806 | 744 | 565 | 589 | 595 | 621 | 628 | 592 | 767 | 769 | 746 |   |   |   |   |   |
| H230 | 736,9  | 639,9 | 562,2 | 483,3 | 417,6 | 336,9 | 238   | 787 | 703 | 385 | 319 | 257 | 214 | 194 | 184 | 176 | 173 | 450 |   |   |   |   | 1 |
| H231 | 906,2  | 801,3 | 714   | 620,5 | 532,3 | 436,2 | 323,1 | 877 | 825 | 474 | 401 | 334 | 289 | 262 | 244 | 231 | 227 | 493 |   |   |   |   | 1 |
| H232 | 867,7  | 743,6 | 647,9 | 555,1 | 470,3 | 370,3 | 272,3 | 815 | 757 | 599 | 487 | 401 | 358 | 308 | 304 | 264 | 251 | 652 |   |   |   |   |   |
| H233 | 759,3  | 675,5 | 608,1 | 527,9 | 453,8 | 368,2 | 270,8 | 806 | 742 | 588 | 482 | 398 | 369 | 321 | 399 | 351 | 330 | 706 |   |   |   |   |   |
| H234 | 860,6  | 763,8 | 686,7 | 611,3 | 531,7 | 433,1 | 310,1 | 888 | 827 | 571 | 498 | 441 | 451 | 405 | 385 | 346 | 328 | 779 |   |   |   |   |   |
| H235 | 887,8  | 793,7 | 713,7 | 636,2 | 555,3 | 445,6 | 324,9 | 881 | 830 | 560 | 467 | 389 | 336 | 302 | 279 | 257 | 249 | 638 |   |   |   |   |   |
| H236 | 847,2  | 748,7 | 666   | 580   | 495,7 | 405,5 | 313,2 | 882 | 826 | 523 | 442 | 371 | 321 | 289 | 271 | 257 | 252 | 603 |   |   |   |   |   |
| H237 | 852,3  | 759,6 | 689,8 | 618,9 | 541   | 439,8 | 312,5 | 832 | 776 | 468 | 399 | 334 | 288 | 259 | 239 | 221 | 215 | 527 |   |   |   |   |   |
| H238 | 801,2  | 703,6 | 628,3 | 535,6 | 461,1 | 377,3 | 280,8 | 885 | 796 | 497 | 429 | 366 | 315 | 280 | 253 | 230 | 222 | 518 |   |   |   |   |   |

|      |       |       |       |       |       |       |       |     |     |     |     |     |     |     |     |     |     |     |  |   |   |   |   |   |
|------|-------|-------|-------|-------|-------|-------|-------|-----|-----|-----|-----|-----|-----|-----|-----|-----|-----|-----|--|---|---|---|---|---|
| H239 | 784,3 | 679,2 | 612,4 | 548,5 | 488,4 | 414,2 | 312,7 | 794 | 755 | 547 | 477 | 423 | 378 | 348 | 327 | 303 | 291 | 670 |  |   |   |   |   |   |
| H24  | 781,2 | 679,3 | 593,9 | 726,6 | 638,5 | 568,2 | 462   | 708 | 649 | 518 | 535 | 518 | 557 | 598 | 561 | 670 | 675 | 651 |  |   |   |   |   |   |
| H240 | 702,2 | 311,1 | 546,1 | 473,3 | 401,1 | 323,3 | 245   | 790 | 685 | 433 | 353 | 286 | 243 | 220 | 206 | 194 | 190 | 456 |  |   |   |   | 1 | 1 |
| H241 | 824,6 | 716,6 | 633,5 | 548,5 | 469,2 | 373,8 | 267   | 821 | 775 | 485 | 393 | 313 | 263 | 240 | 229 | 221 | 217 | 561 |  |   |   |   |   | 1 |
| H242 | 859,3 | 756   | 670,8 | 580,5 | 489,4 | 387   | 290,3 | 863 | 809 | 515 | 419 | 337 | 286 | 264 | 253 | 245 | 242 | 619 |  |   |   |   |   | 1 |
| H243 | 778,6 | 683,1 | 595,6 | 507,3 | 417,8 | 326,2 | 240,6 | 772 | 705 | 362 | 276 | 226 | 201 | 192 | 187 | 183 | 181 | 525 |  | 1 | 1 | 1 | 1 | 1 |
| H244 | 818,7 | 744,1 | 693,8 | 636,1 | 567,5 | 487,1 | 402,8 | 804 | 765 | 544 | 487 | 442 | 405 | 382 | 362 | 339 | 329 | 651 |  |   |   |   |   |   |
| H245 | 838   | 712,6 | 623,1 | 523,3 | 446,3 | 362,2 | 278,2 | 844 | 783 | 450 | 376 | 315 | 274 | 253 | 241 | 232 | 229 | 539 |  |   |   |   |   | 1 |
| H246 | 769,3 | 677,6 | 611,2 | 536,2 | 462,2 | 366,5 | 262,7 | 751 | 695 | 416 | 327 | 257 | 218 | 201 | 193 | 183 | 184 | 501 |  |   |   | 1 | 1 | 1 |
| H247 | 763,8 | 663,3 | 588,2 | 513,2 | 438   | 345,2 | 257,3 | 802 | 738 | 472 | 388 | 309 | 253 | 225 | 210 | 199 | 195 | 511 |  |   |   | 1 |   | 1 |
| H248 | 738   | 650,1 | 583,7 | 515,8 | 448,9 | 367,9 | 273,3 | 746 | 692 | 467 | 396 | 334 | 285 | 250 | 228 | 208 | 200 | 781 |  |   |   |   |   |   |
| H249 | 756   | 656,9 | 575,6 | 490,9 | 414   | 330,8 | 250,3 | 754 | 696 | 433 | 361 | 239 | 246 | 221 | 208 | 197 | 193 | 456 |  |   |   |   |   | 1 |
| H25  | 709,8 | 604,6 | 529,8 | 673,6 | 602,2 | 557,6 | 452,7 | 718 | 663 | 530 | 505 | 492 | 535 | 540 | 507 | 639 | 642 | 624 |  |   |   |   |   |   |
| H250 | 795,7 | 710,4 | 642,8 | 569,6 | 494,2 | 403,7 | 307,7 | 783 | 728 | 491 | 422 | 364 | 318 | 288 | 267 | 245 | 238 | 539 |  |   |   |   |   |   |
| H251 | 781,6 | 693,2 | 621,4 | 542,3 | 449,7 | 358,6 | 274,8 | 761 | 700 | 409 | 329 | 268 | 233 | 219 | 210 | 205 | 203 | 469 |  |   |   | 1 | 1 | 1 |
| H252 | 846,7 | 726,1 | 627,8 | 520,6 | 439,1 | 359,2 | 274,5 | 800 | 723 | 413 | 335 | 275 | 239 | 225 | 217 | 212 | 210 | 559 |  |   |   | 1 | 1 | 1 |
| H253 | 843,8 | 740,9 | 660,4 | 580,7 | 507,7 | 412,8 | 308,9 | 807 | 754 | 505 | 426 | 363 | 314 | 279 | 257 | 236 | 227 | 566 |  |   |   |   |   |   |
| H254 | 812,5 | 718,1 | 651,4 | 579,4 | 504,8 | 406,2 | 296,1 | 836 | 771 | 523 | 437 | 369 | 315 | 278 | 253 | 229 | 221 | 585 |  |   |   |   |   |   |
| H255 | 835,3 | 747,2 | 680,6 | 602,6 | 515,2 | 409,2 | 300,5 | 855 | 799 | 539 | 455 | 386 | 332 | 294 | 268 | 241 | 230 | 594 |  |   |   |   |   |   |
| H256 | 846,4 | 758,7 | 688,5 | 609   | 526,1 | 408,5 | 285,3 | 825 | 766 | 511 | 428 | 355 | 297 | 260 | 238 | 219 | 214 | 530 |  |   |   |   |   |   |
| H257 | 847,5 | 744,5 | 666,7 | 582   | 501,4 | 397,9 | 284,9 | 797 | 740 | 484 | 406 | 342 | 292 | 262 | 243 | 228 | 222 | 535 |  |   |   |   |   |   |
| H258 | 850,1 | 742,4 | 663   | 570,9 | 478,3 | 387,4 | 289,2 | 840 | 767 | 465 | 385 | 317 | 267 | 247 | 236 | 228 | 225 | 531 |  |   |   |   | 1 | 1 |
| H259 | 843,5 | 707,9 | 587,9 | 469,8 | 384,6 | 366,9 | 240,1 | 786 | 688 | 321 | 243 | 215 | 198 | 196 | 193 | 192 | 192 | 568 |  | 1 | 1 | 1 | 1 | 1 |
| H26  | 758,6 | 648,2 | 566,8 | 749,4 | 650,9 | 575,5 | 434,1 | 582 | 612 | 455 | 419 | 437 | 440 | 439 | 395 | 625 | 618 | 588 |  |   |   |   |   |   |
| H260 | 867   | 753,3 | 667,8 | 583,3 | 499,9 | 404   | 285,8 | 793 | 743 | 467 | 380 | 306 | 254 | 231 | 219 | 212 | 209 | 520 |  |   |   |   |   |   |
| H261 | 889,9 | 801,9 | 800,7 | 647,1 | 566,7 | 460,3 | 339,8 | 849 | 807 | 543 | 449 | 370 | 311 | 279 | 261 | 244 | 239 | 550 |  |   |   |   |   |   |
| H262 | 859,4 | 762   | 654,5 | 609,7 | 530,6 | 424,4 | 300,6 | 846 | 785 | 514 | 417 | 334 | 275 | 242 | 224 | 211 | 206 | 458 |  |   |   |   |   |   |
| H263 | 852,5 | 744,8 | 678,6 | 569,4 | 486   | 381,9 | 270,9 | 820 | 762 | 521 | 427 | 345 | 278 | 236 | 219 | 207 | 203 | 511 |  |   |   |   |   |   |
| H265 | 838,8 | 733,9 | 729   | 566,9 | 464,7 | 356,2 | 242,4 | 781 | 711 | 356 | 257 | 212 | 195 | 190 | 186 | 184 | 183 | 540 |  | 1 | 1 | 1 | 1 | 1 |
| H266 | 833,7 | 716,7 | 643,5 | 545,8 | 456   | 373,9 | 278,5 | 819 | 742 | 480 | 396 | 326 | 279 | 242 | 219 | 205 | 200 | 510 |  |   |   |   |   | 1 |
| H267 | 861,5 | 749,5 | 667   | 583,4 | 509,8 | 411,2 | 295,2 | 797 | 745 | 515 | 440 | 364 | 307 | 265 | 239 | 221 | 215 | 531 |  |   |   |   |   |   |

|      |       |       |       |       |       |       |       |     |     |     |     |     |     |     |     |     |     |     |  |   |   |   |
|------|-------|-------|-------|-------|-------|-------|-------|-----|-----|-----|-----|-----|-----|-----|-----|-----|-----|-----|--|---|---|---|
| H268 | 950,3 | 862,9 | 800,7 | 736,6 | 670   | 567,6 | 429,9 | 916 | 884 | 671 | 585 | 518 | 464 | 424 | 396 | 366 | 352 | 787 |  |   |   |   |
| H269 | 843,8 | 742,4 | 654,5 | 547,5 | 451,5 | 346,9 | 248,5 | 740 | 686 | 398 | 314 | 255 | 222 | 208 | 200 | 195 | 193 | 798 |  | 1 |   | 1 |
| H27  | 829   | 699,2 | 611,1 | 768,5 | 679,7 | 623   | 547,1 | 802 | 745 | 625 | 598 | 572 | 546 | 581 | 542 | 618 | 623 | 601 |  |   |   |   |
| H270 | 869,1 | 758,3 | 678,6 | 593,7 | 510,4 | 401,7 | 295,8 | 836 | 774 | 507 | 408 | 321 | 263 | 236 | 221 | 211 | 206 | 512 |  |   |   |   |
| H271 | 861,3 | 756,1 | 670,5 | 585,8 | 504   | 407   | 299   | 820 | 753 | 508 | 415 | 336 | 275 | 238 | 217 | 202 | 198 | 491 |  |   |   |   |
| H272 | 923,6 | 812,1 | 729   | 633,9 | 532,1 | 415,3 | 298,4 | 875 | 817 | 502 | 405 | 324 | 268 | 243 | 233 | 225 | 222 | 556 |  | 1 |   | 1 |
| H273 | 870,9 | 747,4 | 655,3 | 539   | 453,1 | 366,5 | 273,5 | 836 | 751 | 425 | 321 | 247 | 218 | 209 | 203 | 200 | 199 | 530 |  |   | 1 | 1 |
| H274 | 950   | 839,2 | 753,9 | 667,8 | 573,7 | 458,7 | 339,4 | 901 | 852 | 574 | 496 | 420 | 358 | 312 | 284 | 262 | 255 | 632 |  |   |   |   |
| H275 | 959,8 | 850,9 | 765,5 | 677   | 594   | 493,5 | 371,3 | 880 | 851 | 590 | 510 | 437 | 381 | 337 | 309 | 284 | 274 | 666 |  |   |   |   |
| H276 | 982,2 | 881   | 748   | 701,6 | 602   | 474,2 | 341   | 948 | 888 | 577 | 471 | 391 | 337 | 300 | 279 | 263 | 257 | 607 |  |   |   |   |
| H277 | 910,5 | 804,2 | 719,6 | 621,9 | 522,6 | 406,8 | 291,1 | 828 | 761 | 493 | 401 | 331 | 285 | 257 | 244 | 235 | 231 | 585 |  |   |   |   |
| H278 | 962,4 | 844,9 | 754,6 | 657,3 | 564   | 457,8 | 332,9 | 922 | 854 | 563 | 468 | 386 | 323 | 284 | 263 | 246 | 239 | 603 |  |   |   |   |
| H279 | 889,9 | 761,5 | 673,6 | 582,1 | 501,7 | 409   | 307   | 845 | 773 | 509 | 434 | 371 | 321 | 285 | 260 | 239 | 231 | 564 |  |   |   |   |
| H28  | 792,6 | 658   | 566,4 | 731,7 | 545,5 | 626,1 | 647,5 | 801 | 733 | 617 | 624 | 592 | 622 | 677 | 633 | 654 | 669 | 643 |  |   |   |   |
| H280 | 897,4 | 782,6 | 696,6 | 603,7 | 525,6 | 439,7 | 338,2 | 900 | 825 | 559 | 479 | 414 | 363 | 324 | 299 | 274 | 263 | 325 |  |   |   |   |
| H281 | 855,8 | 723,4 | 625,4 | 534,5 | 458,1 | 369,7 | 274,5 | 846 | 774 | 461 | 380 | 316 | 275 | 250 | 238 | 229 | 226 | 545 |  | 1 |   | 1 |
| H282 | 921,8 | 824,4 | 748   | 669,9 | 548   | 503,5 | 373,6 | 913 | 860 | 619 | 539 | 470 | 419 | 380 | 355 | 330 | 319 | 766 |  |   |   |   |
| H283 | 943   | 931,3 | 743,8 | 653,9 | 568,9 | 467,6 | 338,8 | 892 | 829 | 549 | 468 | 401 | 355 | 320 | 297 | 274 | 264 | 644 |  |   |   |   |
| H284 | 912,6 | 826,1 | 769,4 | 707   | 648,4 | 558,9 | 454,9 | 894 | 843 | 626 | 549 | 493 | 455 | 423 | 401 | 377 | 365 | 789 |  |   |   |   |
| H285 | 921,5 | 816,4 | 739,1 | 659   | 586   | 490   | 373   | 883 | 825 | 600 | 531 | 479 | 433 | 402 | 377 | 352 | 339 | 740 |  |   |   |   |
| H286 | 953,6 | 840,7 | 753   | 652,6 | 563,4 | 463,8 | 346,6 | 891 | 822 | 523 | 437 | 370 | 323 | 294 | 277 | 265 | 261 | 568 |  |   |   | 1 |
| H287 | 974,3 | 846,8 | 750,7 | 638,5 | 552,4 | 467,5 | 356,3 | 910 | 831 | 553 | 477 | 412 | 362 | 325 | 302 | 282 | 275 | 586 |  |   |   |   |
| H288 | 822,6 | 709,4 | 627,2 | 542,6 | 471,4 | 394   | 301,2 | 836 | 761 | 477 | 396 | 326 | 279 | 249 | 235 | 224 | 219 | 507 |  |   |   |   |
| H289 | 918,6 | 818,6 | 749,3 | 668,4 | 604,8 | 525,5 | 424,8 | 910 | 853 | 631 | 564 | 497 | 451 | 415 | 390 | 369 | 357 | 736 |  |   |   |   |
| H29  | 943,3 | 818,6 | 732,4 | 894,6 | 814,2 | 704,5 | 565,3 | 881 | 819 | 678 | 673 | 749 | 730 | 729 | 695 | 854 | 862 | 839 |  |   |   |   |
| H290 | 870,7 | 770,6 | 694,2 | 610,7 | 542,1 | 451,1 | 338,8 | 878 | 811 | 564 | 487 | 416 | 366 | 330 | 304 | 281 | 268 | 658 |  |   |   |   |
| H291 | 874,5 | 765,3 | 694,4 | 603,3 | 528,3 | 439,9 | 340,3 | 827 | 757 | 512 | 450 | 398 | 357 | 327 | 305 | 284 | 273 | 625 |  |   |   |   |
| H292 | 855,7 | 789,9 | 717,1 | 626,2 | 553,8 | 468   | 367,1 | 858 | 791 | 563 | 501 | 441 | 398 | 366 | 343 | 320 | 309 | 670 |  |   |   |   |
| H293 | 886   | 758,2 | 672,9 | 576,3 | 498,7 | 406   | 299,4 | 852 | 773 | 516 | 443 | 375 | 328 | 295 | 271 | 252 | 245 | 594 |  |   |   |   |
| H294 | 919,5 | 772,7 | 671,6 | 562,7 | 486,1 | 398,2 | 293,9 | 875 | 789 | 495 | 424 | 361 | 315 | 280 | 259 | 243 | 237 | 550 |  |   |   |   |
| H295 | 858,6 | 749,9 | 657,2 | 548,8 | 461,6 | 361,9 | 258,3 | 751 | 703 | 480 | 421 | 368 | 327 | 301 | 282 | 262 | 249 | 609 |  |   |   |   |

[illegible]

|      |       |       |       |       |       |       |       |     |     |     |     |     |     |     |     |     |     |     |  |  |  |  |   |   |   |   |
|------|-------|-------|-------|-------|-------|-------|-------|-----|-----|-----|-----|-----|-----|-----|-----|-----|-----|-----|--|--|--|--|---|---|---|---|
| H323 | 863,9 | 745,3 | 660,7 | 569,6 | 477,2 | 383,9 | 288,2 | 799 | 723 | 356 | 269 | 231 | 213 | 203 | 198 | 196 | 194 | 511 |  |  |  |  | 1 | 1 | 1 | 1 |
| H324 | 945,8 | 801,8 | 677,5 | 556,5 | 453,7 | 656   | 273,4 | 882 | 807 | 456 | 353 | 282 | 254 | 244 | 239 | 237 | 236 | 727 |  |  |  |  | 1 | 1 | 1 | 1 |
| H325 | 858   | 759,5 | 692,4 | 620,7 | 553,1 | 466,6 | 364,4 | 881 | 823 | 552 | 477 | 416 | 368 | 333 | 308 | 284 | 272 | 675 |  |  |  |  |   |   |   |   |
| H326 | 918,7 | 817,3 | 744,4 | 671,9 | 601,1 | 509,2 | 388,4 | 935 | 884 | 651 | 560 | 486 | 428 | 385 | 358 | 333 | 322 | 780 |  |  |  |  |   |   |   |   |
| H327 | 912,1 | 804,8 | 716,3 | 622,6 | 537,6 | 449,2 | 351,3 | 891 | 829 | 579 | 487 | 401 | 344 | 310 | 291 | 277 | 272 | 685 |  |  |  |  |   |   |   |   |
| H328 | 843,8 | 768,9 | 716,6 | 651,4 | 578,8 | 495,4 | 383,6 | 892 | 838 | 647 | 563 | 493 | 438 | 398 | 368 | 343 | 330 | 779 |  |  |  |  |   |   |   |   |
| H329 | 980   | 864,6 | 768   | 673,8 | 591,4 | 510,5 | 423,1 | 938 | 865 | 617 | 541 | 480 | 432 | 399 | 378 | 363 | 355 | 755 |  |  |  |  |   |   |   | 1 |
| H33  | 835,4 | 734,3 | 658,8 | 795,9 | 717,3 | 629,7 | 517,6 | 775 | 723 | 566 | 526 | 498 | 530 | 530 | 496 | 665 | 661 | 639 |  |  |  |  |   |   |   |   |
| H330 | 934,6 | 808,6 | 715,7 | 621,6 | 530,3 | 427,2 | 321,8 | 840 | 784 | 477 | 376 | 314 | 284 | 272 | 262 | 258 | 256 | 663 |  |  |  |  | 1 | 1 | 1 | 1 |
| H331 | 848,2 | 777,8 | 722,2 | 676,7 | 628,9 | 553,2 | 440,6 | 858 | 815 | 659 | 584 | 516 | 466 | 429 | 401 | 375 | 362 | 766 |  |  |  |  |   |   |   |   |
| H332 | 831,6 | 735,7 | 664,8 | 592,1 | 521,4 | 427,6 | 311,8 | 797 | 748 | 517 | 435 | 371 | 321 | 285 | 262 | 243 | 234 | 624 |  |  |  |  |   |   |   |   |
| H333 | 866,2 | 773,2 | 707,8 | 640,1 | 579,5 | 502   | 402   | 923 | 867 | 656 | 569 | 498 | 443 | 402 | 374 | 347 | 335 | 756 |  |  |  |  |   |   |   |   |
| H334 | 876,1 | 783,4 | 704,4 | 621,6 | 536,1 | 429   | 309   | 825 | 769 | 504 | 407 | 326 | 273 | 248 | 235 | 228 | 225 | 658 |  |  |  |  |   |   |   |   |
| H335 | 835,4 | 721,1 | 627,9 | 542,9 | 466,5 | 384,4 | 287,4 | 789 | 715 | 466 | 394 | 332 | 280 | 242 | 220 | 208 | 204 | 568 |  |  |  |  |   |   |   |   |
| H336 | 859,7 | 758,7 | 678,6 | 601,1 | 506,1 | 393,9 | 281,1 | 793 | 714 | 437 | 339 | 270 | 237 | 221 | 212 | 209 | 207 | 618 |  |  |  |  |   |   | 1 | 1 |
| H337 | 900,3 | 780,1 | 708,1 | 623,7 | 552,1 | 455,6 | 347,5 | 848 | 804 | 572 | 502 | 440 | 389 | 352 | 326 | 300 | 288 | 701 |  |  |  |  |   |   |   |   |
| H338 | 899,4 | 811   | 744,6 | 672,5 | 597,2 | 484,1 | 350,8 | 862 | 816 | 580 | 499 | 432 | 375 | 336 | 310 | 285 | 275 | 689 |  |  |  |  |   |   |   |   |
| H339 | 912,3 | 814,9 | 732,6 | 647,4 | 558,6 | 441,5 | 331,6 | 888 | 831 | 494 | 392 | 325 | 288 | 265 | 253 | 243 | 238 | 607 |  |  |  |  |   |   |   | 1 |
| H34  | 807,1 | 691,3 | 598,1 | 750,4 | 663,1 | 598,6 | 581,9 | 799 | 736 | 606 | 594 | 558 | 531 | 578 | 539 | 657 | 650 | 622 |  |  |  |  |   |   |   |   |
| H340 | 840,5 | 726,2 | 651,7 | 572,8 | 481,1 | 360,4 | 258,7 | 790 | 721 | 386 | 298 | 247 | 225 | 215 | 210 | 207 | 205 | 621 |  |  |  |  |   | 1 | 1 | 1 |
| H341 | 798,7 | 708,7 | 640,9 | 573,2 | 491,1 | 386,2 | 279,2 | 813 | 747 | 484 | 395 | 318 | 267 | 234 | 218 | 209 | 204 | 558 |  |  |  |  |   |   |   |   |
| H342 | 872,2 | 759,3 | 669,3 | 572,2 | 477   | 382,3 | 289,3 | 796 | 731 | 410 | 318 | 261 | 236 | 224 | 218 | 215 | 213 | 639 |  |  |  |  |   | 1 | 1 | 1 |
| H343 | 842,1 | 690,8 | 568,9 | 464,4 | 381,2 | 296,7 | 227,4 | 699 | 623 | 348 | 271 | 231 | 216 | 209 | 205 | 204 | 204 | 679 |  |  |  |  | 1 | 1 | 1 | 1 |
| H344 | 800,7 | 675,7 | 589,7 | 513,9 | 443,5 | 348,8 | 258,9 | 785 | 731 | 558 | 450 | 363 | 290 | 247 | 223 | 209 | 204 | 616 |  |  |  |  |   |   |   |   |
| H345 | 778   | 668,1 | 586,7 | 509,2 | 444,6 | 371,3 | 281,1 | 822 | 756 | 502 | 425 | 365 | 316 | 290 | 273 | 250 | 241 | 602 |  |  |  |  |   |   |   |   |
| H346 | 828,5 | 713,7 | 624,5 | 532,4 | 446,7 | 360,4 | 272,9 | 819 | 763 | 434 | 338 | 275 | 240 | 223 | 214 | 207 | 205 | 567 |  |  |  |  |   |   | 1 | 1 |
| H347 | 812,1 | 711,3 | 641,2 | 566,8 | 494,6 | 415,4 | 317   | 841 | 778 | 530 | 444 | 373 | 319 | 282 | 259 | 242 | 235 | 582 |  |  |  |  |   |   |   |   |
| H348 | 825,6 | 731,9 | 647,4 | 547,2 | 456,9 | 353,7 | 254,9 | 811 | 730 | 360 | 251 | 215 | 201 | 195 | 192 | 191 | 189 | 606 |  |  |  |  |   | 1 | 1 | 1 |
| H349 | 833,5 | 728,5 | 655,1 | 583,4 | 498,2 | 375,7 | 253,3 | 788 | 713 | 421 | 326 | 248 | 211 | 196 | 188 | 184 | 182 | 574 |  |  |  |  |   |   | 1 | 1 |
| H35  | 790,1 | 681,2 | 604,1 | 759   | 677,5 | 637,8 | 634   | 777 | 721 | 630 | 629 | 611 | 616 | 671 | 639 | 657 | 659 | 642 |  |  |  |  |   |   |   |   |
| H350 | 774,7 | 671,5 | 589,9 | 504,7 | 417   | 324,7 | 236,2 | 696 | 608 | 322 | 247 | 208 | 189 | 179 | 174 | 174 | 173 | 517 |  |  |  |  |   |   | 1 | 1 |

|      |       |       |       |       |       |       |       |     |     |     |     |     |     |     |     |     |     |     |   |   |   |   |   |
|------|-------|-------|-------|-------|-------|-------|-------|-----|-----|-----|-----|-----|-----|-----|-----|-----|-----|-----|---|---|---|---|---|
| H351 | 836,8 | 717,1 | 634,5 | 544,5 | 452,4 | 349,6 | 258   | 773 | 720 | 571 | 449 | 360 | 291 | 266 | 339 | 292 | 271 | 684 |   |   |   |   |   |
| H352 | 849,8 | 764,7 | 699,7 | 637,7 | 579,5 | 487,2 | 366,5 | 849 | 795 | 518 | 424 | 348 | 297 | 276 | 410 | 355 | 328 | 737 |   |   |   |   |   |
| H353 | 757   | 681,2 | 623,1 | 570,8 | 518   | 431,9 | 313,7 | 745 | 680 | 539 | 428 | 333 | 260 | 217 | 197 | 184 | 178 | 472 |   |   |   |   |   |
| H354 | 855   | 781,1 | 719,3 | 653,5 | 588,9 | 488   | 367,8 | 862 | 806 | 679 | 592 | 510 | 445 | 398 | 366 | 333 | 316 | 755 |   |   |   |   |   |
| H355 | 759,3 | 682,5 | 630,1 | 572,2 | 507,8 | 415,4 | 303,5 | 739 | 686 | 458 | 366 | 325 | 252 | 228 | 273 | 233 | 217 | 491 |   |   |   |   |   |
| H356 | 805,5 | 697,2 | 617,5 | 537,3 | 459,1 | 355,5 | 259,7 | 758 | 673 | 338 | 244 | 204 | 189 | 220 | 271 | 249 | 239 | 555 | 1 | 1 | 1 | 1 | 1 |
| H357 | 721,5 | 622,1 | 538,9 | 454,8 | 371   | 300,6 | 223,4 | 665 | 581 | 291 | 220 | 185 | 168 | 210 | 380 | 355 | 341 | 589 | 1 | 1 | 1 | 1 | 1 |
| H358 | 751,8 | 656,4 | 587,8 | 465   | 453,3 | 366   | 262   | 738 | 695 | 593 | 505 | 428 | 486 | 441 | 460 | 434 | 411 | 735 |   |   |   |   |   |
| H359 | 731,6 | 621,3 | 544   | 458,5 | 386,4 | 305,1 | 225   | 781 | 723 | 576 | 443 | 342 | 360 | 294 | 258 | 240 | 224 | 620 |   |   |   |   |   |
| H36  | 921,1 | 783,7 | 675,1 | 862,2 | 761,4 | 633   | 466,4 | 826 | 756 | 553 | 542 | 612 | 647 | 656 | 622 | 819 | 813 | 783 |   |   |   |   |   |
| H360 | 839,4 | 737,7 | 659,9 | 582,5 | 505,2 | 410,3 | 289   | 844 | 778 | 637 | 532 | 443 | 436 | 382 | 345 | 331 | 310 | 760 |   |   |   |   |   |
| H361 | 855   | 747,5 | 667,4 | 581,6 | 493,7 | 386,2 | 278,7 | 820 | 764 | 609 | 490 | 391 | 319 | 268 | 245 | 234 | 227 | 638 |   |   |   |   |   |
| H362 | 759,3 | 661,9 | 581,8 | 502,5 | 418,8 | 319,9 | 239,6 | 771 | 703 | 444 | 338 | 259 | 272 | 230 | 217 | 207 | 202 | 548 |   |   |   |   |   |
| H363 | 805,5 | 758,8 | 670,5 | 577,5 | 493   | 397,9 | 287,7 | 844 | 774 | 491 | 395 | 321 | 300 | 265 | 249 | 234 | 224 | 564 |   |   |   |   |   |
| H364 | 721,5 | 705,3 | 631,5 | 559,8 | 488,1 | 406,9 | 293,7 | 748 | 679 | 423 | 345 | 272 | 222 | 219 | 204 | 201 | 197 | 525 |   |   | 1 |   | 1 |
| H365 | 755,9 | 668,8 | 598   | 532,9 | 447,7 | 354,3 | 257,9 | 728 | 681 | 540 | 420 | 319 | 299 | 245 | 217 | 261 | 237 | 588 |   |   |   |   |   |
| H366 | 784,4 | 689,5 | 632,4 | 573,8 | 507,3 | 389,1 | 268,9 | 741 | 689 | 527 | 424 | 338 | 349 | 291 | 255 | 263 | 242 | 630 |   |   |   |   |   |
| H367 | 805,6 | 681,1 | 591,7 | 506,8 | 424,7 | 336,1 | 259,7 | 826 | 764 | 568 | 451 | 355 | 298 | 256 | 244 | 245 | 238 | 663 |   |   |   |   |   |
| H368 | 775,2 | 671,4 | 595,8 | 525,6 | 459,1 | 378,2 | 287,1 | 756 | 711 | 552 | 452 | 370 | 309 | 266 | 242 | 222 | 213 | 552 |   |   |   |   |   |
| H369 | 783,8 | 693,7 | 625   | 559,3 | 499   | 422,8 | 320,9 | 822 | 765 | 636 | 532 | 452 | 403 | 361 | 334 | 326 | 309 | 661 |   |   |   |   |   |
| H37  | 936,8 | 839,5 | 765,3 | 891,8 | 815,2 | 714,5 | 577,2 | 867 | 816 | 686 | 673 | 778 | 758 | 757 | 726 | 829 | 815 | 794 |   |   |   |   |   |
| H370 | 908,1 | 799,8 | 720   | 637,7 | 556   | 450,6 | 328,2 | 899 | 838 | 586 | 491 | 423 | 377 | 340 | 314 | 340 | 327 | 688 |   |   |   |   |   |
| H371 | 830,2 | 700,7 | 604,3 | 510,5 | 427,1 | 332,4 | 238,1 | 779 | 704 | 384 | 305 | 246 | 259 | 221 | 207 | 206 | 200 | 590 |   |   |   |   |   |
| H372 | 873,6 | 742,3 | 652,3 | 562,5 | 476,9 | 375,8 | 269,4 | 815 | 755 | 483 | 393 | 316 | 267 | 246 | 238 | 232 | 228 | 668 |   |   | 1 |   | 1 |
| H373 | 844,5 | 750,2 | 683,2 | 613,9 | 539,1 | 425,5 | 302,9 | 805 | 768 | 635 | 548 | 420 | 344 | 291 | 262 | 239 | 230 | 639 |   |   |   |   |   |
| H374 | 862,6 | 745,9 | 662,9 | 561,8 | 461,2 | 368,5 | 274,1 | 853 | 782 | 440 | 349 | 280 | 245 | 230 | 222 | 216 | 214 | 621 | 1 | 1 | 1 | 1 | 1 |
| H375 | 807,9 | 716,5 | 647,1 | 569,1 | 475,1 | 358,3 | 248,7 | 749 | 681 | 319 | 231 | 203 | 189 | 184 | 182 | 181 | 179 | 555 | 1 | 1 | 1 | 1 | 1 |
| H376 | 787,9 | 704,5 | 641,7 | 576   | 511,5 | 414,1 | 299,3 | 756 | 699 | 425 | 337 | 265 | 223 | 203 | 193 | 187 | 183 | 557 |   |   | 1 |   | 1 |
| H377 | 852,2 | 760,3 | 685,3 | 610,6 | 532,6 | 429,3 | 312,1 | 819 | 762 | 463 | 362 | 274 | 229 | 213 | 205 | 200 | 197 | 574 |   |   | 1 |   | 1 |
| H378 | 803   | 686,4 | 604,8 | 522,5 | 446,1 | 350,5 | 254,1 | 831 | 754 | 460 | 370 | 299 | 250 | 226 | 214 | 207 | 203 | 543 |   |   |   |   | 1 |
| H379 | 789   | 683,9 | 592,7 | 492,6 | 405,3 | 324,1 | 240,4 | 672 | 594 | 286 | 226 | 197 | 180 | 173 | 170 | 172 | 170 | 517 | 1 | 1 | 1 | 1 | 1 |



|      |       |       |       |       |       |       |       |     |     |     |     |     |     |     |     |     |     |     |   |   |   |   |   |
|------|-------|-------|-------|-------|-------|-------|-------|-----|-----|-----|-----|-----|-----|-----|-----|-----|-----|-----|---|---|---|---|---|
| H38  | 867,1 | 764,4 | 687,2 | 821,6 | 744,1 | 630,5 | 492,9 | 764 | 712 | 560 | 532 | 570 | 533 | 522 | 490 | 680 | 670 | 648 |   |   |   |   |   |
| H380 | 763,8 | 677,1 | 599,7 | 523   | 448,5 | 357,1 | 241,5 | 708 | 651 | 374 | 267 | 199 | 183 | 174 | 172 | 169 | 168 | 572 | 1 | 1 | 1 | 1 | 1 |
| H381 | 852   | 754,8 | 685,8 | 619,7 | 550,8 | 456,3 | 334,1 | 831 | 763 | 557 | 471 | 411 | 358 | 318 | 292 | 268 | 257 | 698 |   |   |   |   |   |
| H382 | 831   | 725,6 | 643,1 | 561   | 488,1 | 401,3 | 296,1 | 842 | 785 | 539 | 432 | 350 | 291 | 254 | 236 | 222 | 217 | 621 |   |   |   |   |   |
| H383 | 840,7 | 732,4 | 645,1 | 555,9 | 470,5 | 374,1 | 281,6 | 823 | 753 | 485 | 392 | 323 | 273 | 244 | 231 | 221 | 216 | 612 |   |   |   | 1 | 1 |
| H384 | 720,5 | 625,5 | 556,4 | 475,1 | 386,3 | 288   | 210,2 | 694 | 622 | 345 | 230 | 184 | 166 | 160 | 156 | 155 | 153 | 437 | 1 | 1 | 1 | 1 | 1 |
| H385 | 791,3 | 699,8 | 627,1 | 546,1 | 452,8 | 338,3 | 234,9 | 747 | 673 | 353 | 249 | 202 | 183 | 175 | 171 | 169 | 168 | 537 | 1 | 1 | 1 | 1 | 1 |
| H386 | 815,3 | 711,3 | 641,7 | 564,9 | 488   | 394,9 | 286,3 | 851 | 791 | 560 | 468 | 404 | 352 | 316 | 291 | 265 | 252 | 321 |   |   |   |   |   |
| H387 | 724   | 636,8 | 566,2 | 500,3 | 444,1 | 377,9 | 284,3 | 694 | 641 | 450 | 387 | 342 | 305 | 279 | 261 | 242 | 232 | 527 |   |   |   |   |   |
| H388 | 833,2 | 733,2 | 664,9 | 596,4 | 530,8 | 443   | 321   | 849 | 800 | 315 | 501 | 426 | 360 | 311 | 281 | 253 | 241 | 694 |   |   |   |   |   |
| H389 | 801,6 | 683,4 | 601,9 | 516,5 | 437,4 | 348   | 237,6 | 693 | 613 | 339 | 241 | 211 | 196 | 191 | 189 | 188 | 188 | 494 | 1 | 1 | 1 | 1 | 1 |
| H39  | 755   | 669,3 | 607,3 | 742,2 | 680,6 | 607   | 516,8 | 751 | 713 | 594 | 569 | 572 | 555 | 550 | 527 | 669 | 661 | 649 |   |   |   |   |   |
| H391 | 864,8 | 739,5 | 653,3 | 551,2 | 448,7 | 351,6 | 270,5 | 794 | 703 | 379 | 288 | 248 | 225 | 216 | 212 | 209 | 208 | 635 |   | 1 | 1 | 1 | 1 |
| H392 | 825,3 | 719,7 | 647,8 | 558,8 | 475,1 | 367   | 251,1 | 786 | 718 | 423 | 314 | 247 | 211 | 198 | 191 | 186 | 184 | 549 |   |   | 1 | 1 | 1 |
| H393 | 751,7 | 635,1 | 543,9 | 451,2 | 378,2 | 303,6 | 232,1 | 680 | 601 | 317 | 248 | 214 | 189 | 178 | 173 | 169 | 168 | 550 | 1 | 1 | 1 | 1 | 1 |
| H394 | 795,3 | 680,9 | 600,5 | 519   | 455,2 | 369,2 | 274,6 | 791 | 722 | 476 | 400 | 343 | 291 | 260 | 239 | 220 | 212 | 602 |   |   |   |   |   |
| H395 | 779,5 | 657,2 | 574,8 | 483,1 | 399,8 | 315,4 | 219,6 | 718 | 643 | 408 | 328 | 280 | 236 | 203 | 188 | 178 | 173 | 536 |   |   |   |   |   |
| H4   | 842,3 | 729,5 | 638,4 | 809   | 709,4 | 675,4 | 661   | 814 | 751 | 650 | 655 | 695 | 632 | 650 | 605 | 710 | 723 | 697 |   |   |   |   |   |
| H40  | 803,8 | 683   | 586,5 | 743,3 | 654,8 | 552,9 | 412,7 | 705 | 629 | 399 | 353 | 390 | 367 | 368 | 329 | 531 | 516 | 488 |   |   |   |   |   |
| H41  | 776,8 | 639,1 | 539,5 | 719,9 | 613,9 | 501,6 | 372   | 725 | 649 | 474 | 448 | 565 | 528 | 539 | 481 | 575 | 559 | 524 |   |   |   |   |   |
| H42  | 855,3 | 721,8 | 627,5 | 829,9 | 732,1 | 666   | 634,8 | 887 | 828 | 724 | 712 | 718 | 680 | 716 | 679 | 673 | 669 | 647 |   |   |   |   |   |
| H43  | 940,1 | 820,5 | 741,7 | 905,9 | 827,2 | 724,7 | 581,8 | 925 | 861 | 723 | 716 | 689 | 657 | 685 | 656 | 831 | 817 | 795 |   |   |   |   |   |
| H44  | 957,3 | 858,6 | 791,3 | 924,5 | 851,7 | 752,8 | 628,7 | 945 | 894 | 816 | 822 | 837 | 807 | 848 | 817 | 890 | 875 | 857 |   |   |   |   |   |
| H45  | 829,8 | 728,9 | 652,2 | 799,1 | 728,7 | 620,4 | 479,8 | 797 | 746 | 639 | 603 | 561 | 521 | 529 | 499 | 688 | 673 | 653 |   |   |   |   |   |
| H46  | 717,7 | 604,8 | 527,7 | 701,6 | 605,7 | 480,3 | 348   | 709 | 638 | 490 | 443 | 395 | 358 | 361 | 323 | 588 | 569 | 544 |   |   |   |   |   |
| H47  | 816,6 | 711,2 | 632,1 | 792,8 | 711,2 | 314,7 | 471,8 | 783 | 723 | 592 | 538 | 498 | 464 | 497 | 464 | 671 | 660 | 638 |   |   |   |   |   |
| H48  | 753,7 | 634,7 | 551,1 | 758   | 681,2 | 627   | 550,7 | 850 | 785 | 698 | 668 | 657 | 624 | 700 | 663 | 726 | 716 | 695 |   |   |   |   |   |
| H49  | 824,5 | 692,9 | 596   | 788,2 | 686,5 | 637,1 | 604,8 | 848 | 775 | 674 | 678 | 684 | 656 | 713 | 668 | 667 | 654 | 626 |   |   |   |   |   |
| H5   | 852,1 | 724,7 | 603   | 776,3 | 606,8 | 498,9 | 409,4 | 683 | 581 | 427 | 406 | 523 | 530 | 534 | 471 | 506 | 507 | 468 |   |   |   |   |   |
| H50  | 983,7 | 866,1 | 779   | 946   | 864,7 | 750,6 | 599,9 | 975 | 914 | 804 | 821 | 772 | 742 | 783 | 748 | 911 | 898 | 874 |   |   |   |   |   |
| H51  | 898,4 | 802,7 | 730,5 | 892,7 | 828,7 | 730,9 | 592,1 | 902 | 855 | 745 | 735 | 697 | 683 | 743 | 711 | 827 | 812 | 794 |   |   |   |   |   |

|     |        |       |       |       |       |       |       |     |     |     |     |     |     |     |     |     |     |     |
|-----|--------|-------|-------|-------|-------|-------|-------|-----|-----|-----|-----|-----|-----|-----|-----|-----|-----|-----|
| H52 | 850,1  | 752,3 | 684,1 | 831,9 | 756,6 | 643,8 | 505,7 | 827 | 764 | 650 | 619 | 572 | 554 | 643 | 608 | 726 | 710 | 689 |
| H53 | 735,1  | 637,9 | 569,4 | 775,3 | 699,4 | 591,2 | 457,5 | 784 | 726 | 567 | 512 | 451 | 447 | 495 | 459 | 672 | 658 | 636 |
| H54 | 827    | 740,7 | 675,2 | 808,6 | 748,3 | 670,9 | 575,4 | 800 | 752 | 693 | 665 | 621 | 642 | 700 | 669 | 725 | 718 | 701 |
| H55 | 845,6  | 736,8 | 646,8 | 806,6 | 713   | 615,5 | 469,5 | 796 | 730 | 600 | 537 | 501 | 507 | 542 | 500 | 539 | 526 | 497 |
| H56 | 853    | 716,2 | 613,4 | 812,7 | 679,3 | 554   | 464,4 | 834 | 731 | 520 | 467 | 517 | 530 | 614 | 554 | 556 | 535 | 496 |
| H57 | 877,3  | 782,6 | 720,2 | 870,7 | 821,1 | 755,5 | 713,3 | 894 | 860 | 804 | 810 | 789 | 791 | 823 | 802 | 858 | 857 | 843 |
| H58 | 897,4  | 794,4 | 714,1 | 888,9 | 817,9 | 702,3 | 574,9 | 895 | 842 | 713 | 683 | 647 | 627 | 649 | 618 | 778 | 767 | 747 |
| H59 | 830,6  | 727,7 | 644,7 | 825,5 | 744   | 617,4 | 457,2 | 798 | 739 | 656 | 600 | 540 | 517 | 556 | 520 | 671 | 662 | 643 |
| H6  | 806,5  | 676,7 | 567,1 | 768,3 | 646,9 | 575,2 | 583,1 | 811 | 734 | 528 | 527 | 621 | 559 | 622 | 568 | 595 | 613 | 583 |
| H60 | 828,2  | 709,7 | 622,1 | 804,7 | 715,7 | 592,6 | 454,5 | 801 | 737 | 599 | 554 | 504 | 516 | 625 | 583 | 698 | 882 | 655 |
| H61 | 790,3  | 683,6 | 596,7 | 773,7 | 684,8 | 575,8 | 435,5 | 771 | 703 | 582 | 540 | 488 | 491 | 535 | 491 | 636 | 624 | 595 |
| H62 | 793,7  | 685,5 | 603,2 | 781,3 | 707,3 | 658,6 | 569,7 | 789 | 719 | 659 | 647 | 606 | 580 | 621 | 586 | 652 | 651 | 630 |
| H63 | 849,4  | 710,6 | 606,8 | 846   | 743,9 | 691,3 | 614,7 | 890 | 818 | 645 | 621 | 605 | 559 | 590 | 549 | 570 | 559 | 531 |
| H64 | 893,6  | 792,6 | 719,7 | 900,5 | 835   | 744,6 | 639,7 | 920 | 876 | 786 | 793 | 759 | 736 | 745 | 713 | 856 | 853 | 835 |
| H65 | 895    | 807   | 744,5 | 900,8 | 840,9 | 752,4 | 681   | 908 | 861 | 785 | 773 | 759 | 738 | 738 | 711 | 819 | 804 | 789 |
| H66 | 840,6  | 730,7 | 648,9 | 834,5 | 747,5 | 620,4 | 475,6 | 823 | 754 | 675 | 641 | 578 | 525 | 516 | 480 | 685 | 669 | 647 |
| H67 | 820,8  | 709,2 | 625,9 | 856,4 | 775,8 | 663,9 | 510,3 | 850 | 784 | 704 | 660 | 639 | 583 | 610 | 570 | 726 | 711 | 686 |
| H68 | 843    | 718,7 | 624,8 | 827,2 | 739,9 | 625,5 | 437,2 | 808 | 728 | 583 | 518 | 646 | 587 | 567 | 516 | 685 | 677 | 646 |
| H69 | 866    | 749,2 | 661,7 | 844,6 | 760,5 | 675,3 | 542,5 | 849 | 781 | 645 | 588 | 541 | 491 | 482 | 444 | 481 | 483 | 457 |
| H7  | 830,8  | 678,5 | 555,8 | 754,3 | 607,4 | 538,8 | 529,9 | 781 | 675 | 626 | 619 | 627 | 600 | 666 | 583 | 610 | 646 | 586 |
| H70 | 844,8  | 709,1 | 610,5 | 822,7 | 714,1 | 669,3 | 578,9 | 838 | 757 | 666 | 644 | 617 | 557 | 584 | 537 | 565 | 561 | 527 |
| H71 | 913,9  | 800,3 | 722,2 | 881,1 | 816   | 725   | 620,6 | 888 | 841 | 776 | 788 | 781 | 757 | 830 | 801 | 881 | 876 | 857 |
| H72 | 915,6  | 837,2 | 784,7 | 909,3 | 863,2 | 791,5 | 748,6 | 926 | 888 | 720 | 706 | 704 | 690 | 714 | 692 | 728 | 720 | 707 |
| H73 | 853,8  | 747,1 | 655,6 | 859,5 | 785,1 | 666,2 | 525,2 | 866 | 804 | 741 | 722 | 678 | 626 | 617 | 579 | 746 | 731 | 707 |
| H74 | 889    | 783,4 | 699,7 | 873,9 | 796,7 | 689,8 | 534,2 | 861 | 799 | 693 | 706 | 705 | 647 | 653 | 616 | 748 | 744 | 717 |
| H75 | 882,7  | 782,8 | 708,3 | 876,9 | 809,4 | 737,1 | 594,6 | 883 | 819 | 735 | 739 | 751 | 703 | 716 | 679 | 763 | 759 | 737 |
| H76 | 866,1  | 743   | 646,4 | 847   | 756,6 | 704,3 | 544,5 | 841 | 773 | 645 | 650 | 642 | 587 | 588 | 542 | 559 | 567 | 535 |
| H77 | 885,1  | 753,8 | 652,1 | 862,2 | 759,5 | 723,6 | 621,7 | 888 | 821 | 720 | 722 | 693 | 634 | 661 | 619 | 660 | 667 | 638 |
| H78 | 1015,9 | 896,6 | 816,9 | 969,4 | 901,5 | 824,5 | 704,6 | 978 | 929 | 798 | 812 | 828 | 800 | 893 | 862 | 937 | 938 | 916 |
| H79 | 971,1  | 876   | 805,9 | 941,5 | 874,6 | 797,8 | 676,2 | 947 | 907 | 774 | 808 | 807 | 783 | 839 | 807 | 882 | 888 | 867 |
| H8  | 941,9  | 833,6 | 744,2 | 877,4 | 811,3 | 783,3 | 780,8 | 878 | 825 | 751 | 769 | 835 | 804 | 796 | 768 | 857 | 869 | 835 |

|     |       |       |       |       |       |       |       |     |     |     |     |     |     |     |     |     |     |     |
|-----|-------|-------|-------|-------|-------|-------|-------|-----|-----|-----|-----|-----|-----|-----|-----|-----|-----|-----|
| H80 | 845,1 | 732,3 | 644,3 | 847,3 | 740,2 | 570,1 | 381,2 | 809 | 734 | 571 | 604 | 583 | 520 | 511 | 462 | 696 | 703 | 671 |
| H81 | 881,9 | 753,4 | 668,6 | 903,9 | 814,4 | 705,8 | 543   | 892 | 834 | 746 | 791 | 795 | 739 | 758 | 715 | 807 | 813 | 783 |
| H82 | 821,4 | 704   | 609,5 | 794,9 | 683,4 | 566,7 | 389,3 | 759 | 675 | 546 | 596 | 663 | 585 | 609 | 542 | 666 | 676 | 630 |
| H83 | 892,6 | 781   | 688,3 | 869,7 | 750,6 | 644,2 | 444,8 | 827 | 732 | 507 | 526 | 375 | 642 | 684 | 612 | 726 | 737 | 689 |
| H84 | 861,8 | 718,8 | 610,9 | 853   | 714,7 | 672,9 | 497,7 | 856 | 772 | 554 | 603 | 640 | 558 | 561 | 498 | 579 | 589 | 539 |
| H85 | 903,5 | 785,2 | 712,9 | 899,2 | 833   | 781,9 | 629,7 | 927 | 876 | 726 | 761 | 763 | 725 | 784 | 749 | 871 | 877 | 850 |
| H86 | 807   | 684,2 | 599,4 | 785,1 | 706,5 | 643,7 | 509,8 | 791 | 176 | 541 | 591 | 632 | 593 | 641 | 604 | 705 | 710 | 682 |
| H87 | 854,4 | 720   | 611,8 | 841,6 | 745,4 | 664   | 473,9 | 857 | 780 | 588 | 671 | 686 | 629 | 673 | 623 | 764 | 770 | 732 |
| H88 | 919,4 | 805,6 | 725,7 | 903,6 | 826,6 | 787,9 | 710,7 | 919 | 852 | 744 | 809 | 822 | 767 | 833 | 787 | 854 | 868 | 832 |
| H89 | 809,3 | 684,7 | 603,1 | 786,9 | 705,7 | 671,8 | 644,9 | 796 | 712 | 552 | 631 | 704 | 621 | 700 | 635 | 735 | 756 | 709 |
| H9  | 849,7 | 715,9 | 602,2 | 762,5 | 651,6 | 562,3 | 496,2 | 667 | 597 | 645 | 642 | 689 | 635 | 641 | 600 | 737 | 745 | 715 |
| H90 | 836,1 | 696,9 | 615,7 | 820,3 | 675,7 | 614,3 | 440,1 | 787 | 679 | 606 | 699 | 711 | 627 | 712 | 632 | 751 | 768 | 705 |
| H91 | 781,1 | 634,7 | 493,9 | 745,5 | 586,9 | 550,2 | 542,8 | 779 | 652 | 435 | 499 | 533 | 420 | 401 | 320 | 468 | 510 | 447 |
| H92 | 859,4 | 723,4 | 654,5 | 783,8 | 762,1 | 681   | 548,7 | 889 | 830 | 691 | 702 | 699 | 655 | 681 | 633 | 780 | 787 | 747 |
| H93 | 865,5 | 734,7 | 668   | 793,7 | 776,2 | 717,7 | 574,2 | 828 | 742 | 589 | 637 | 630 | 580 | 601 | 555 | 709 | 724 | 687 |
| H94 | 865,7 | 705,4 | 609,6 | 732,6 | 736,1 | 677,6 | 522,9 | 849 | 761 | 659 | 700 | 690 | 633 | 678 | 523 | 753 | 764 | 729 |
| H95 | 856,6 | 719,7 | 640,8 | 809,9 | 789   | 733,2 | 668,6 | 900 | 810 | 702 | 753 | 752 | 682 | 760 | 709 | 801 | 823 | 780 |
| H96 | 864,3 | 677,2 | 538,9 | 738,9 | 627,6 | 542,1 | 434,5 | 847 | 723 | 502 | 531 | 647 | 507 | 570 | 466 | 682 | 755 | 662 |
| H97 | 832   | 653   | 534,7 | 734,3 | 632,9 | 572,7 | 556,1 | 804 | 677 | 487 | 464 | 611 | 470 | 613 | 511 | 657 | 739 | 658 |
| H98 | 793,1 | 642,5 | 529,1 | 717,5 | 654,2 | 607,8 | 597,8 | 785 | 671 | 603 | 638 | 660 | 568 | 601 | 524 | 681 | 713 | 664 |
| H99 | 768,9 | 641,1 | 576,1 | 733,7 | 645,3 | 539,1 | 445,3 | 668 | 605 | 433 | 406 | 527 | 483 | 544 | 496 | 508 | 523 | 494 |

---
