# Supplementary material
Source: MDPI journal article supplement (https://www.mdpi.com/1999-4907/8/11/407)
Supplement: s1 [file s1]

Archive with 2 entries (2 files):
- Supplementary basic data2b.pdf
- Supplementary Figures and Tables2b.pdf
